# Supplementary material for: Early initiation of antenatal care and its associated factors among pregnant women attending antenatal care at public health centres in Bahir Dar Zuria zone, Northwest Ethiopia, 2021: a cross-sectional study
Source: PubMed Central journal article supplement — BMJ Open. 2023 Jan 12;13(1):e065169. doi: 10.1136/bmjopen-2022-065169 (PMC9843213; doi:10.1136/bmjopen-2022-065169), 2023-01-12
Supplement: bmjopen-2022-065169.draft_revisions.pdf [file bmjopen-2022-065169.draft_revisions.pdf]

# BMJ Open

BMJ Open is committed to open peer review. As part of this commitment we make the peer review history of every article we publish publicly available.

When an article is published we post the peer reviewers' comments and the authors' responses online. We also post the versions of the paper that were used during peer review. These are the versions that the peer review comments apply to.

The versions of the paper that follow are the versions that were submitted during the peer review process. They are not the versions of record or the final published versions. They should not be cited or distributed as the published version of this manuscript.

BMJ Open is an open access journal and the full, final, typeset and author-corrected version of record of the manuscript is available on our site with no access controls, subscription charges or pay-per-view fees (<http://bmjopen.bmj.com>).

If you have any questions on BMJ Open's open peer review process please email [info.bmjopen@bmj.com](mailto:info.bmjopen@bmj.com)

# BMJ Open

## Early Initiation of Antenatal Care and Factors Associated with Early Antenatal Care Initiation at public Health Facilities at resource limited setting, 2021.

|                               |                                                                                                                                                                                                                                                                                                                                                 |
|-------------------------------|-------------------------------------------------------------------------------------------------------------------------------------------------------------------------------------------------------------------------------------------------------------------------------------------------------------------------------------------------|
| Journal:                      | <i>BMJ Open</i>                                                                                                                                                                                                                                                                                                                                 |
| Manuscript ID                 | bmjopen-2022-065169                                                                                                                                                                                                                                                                                                                             |
| Article Type:                 | Original research                                                                                                                                                                                                                                                                                                                               |
| Date Submitted by the Author: | 30-May-2022                                                                                                                                                                                                                                                                                                                                     |
| Complete List of Authors:     | Ambaye, Eskahun; Debre Markos University College of Health Science, health informatics<br>Hailiye, Gizaw; College of Medicine and Health Sciences Institute of Public Health, Department of Health Informatics, Debre Markos university, Department of Health Informatics<br>Regasa, zegeye; Debre Markos University College of Health Science, |
| Keywords:                     | Maternal medicine < OBSTETRICS, Prenatal diagnosis < OBSTETRICS, PUBLIC HEALTH                                                                                                                                                                                                                                                                  |
|                               |                                                                                                                                                                                                                                                                                                                                                 |

SCHOLARONE™  
Manuscripts

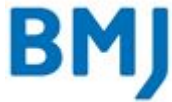

I, the Submitting Author has the right to grant and does grant on behalf of all authors of the Work (as defined in the below author licence), an exclusive licence and/or a non-exclusive licence for contributions from authors who are: i) UK Crown employees; ii) where BMJ has agreed a CC-BY licence shall apply, and/or iii) in accordance with the terms applicable for US Federal Government officers or employees acting as part of their official duties; on a worldwide, perpetual, irrevocable, royalty-free basis to BMJ Publishing Group Ltd ("BMJ") its licensees and where the relevant Journal is co-owned by BMJ to the co-owners of the Journal, to publish the Work in this journal and any other BMJ products and to exploit all rights, as set out in our [licence](#).

The Submitting Author accepts and understands that any supply made under these terms is made by BMJ to the Submitting Author unless you are acting as an employee on behalf of your employer or a postgraduate student of an affiliated institution which is paying any applicable article publishing charge ("APC") for Open Access articles. Where the Submitting Author wishes to make the Work available on an Open Access basis (and intends to pay the relevant APC), the terms of reuse of such Open Access shall be governed by a Creative Commons licence – details of these licences and which [Creative Commons](#) licence will apply to this Work are set out in our licence referred to above.

Other than as permitted in any relevant BMJ Author's Self Archiving Policies, I confirm this Work has not been accepted for publication elsewhere, is not being considered for publication elsewhere and does not duplicate material already published. I confirm all authors consent to publication of this Work and authorise the granting of this licence.

1  
2  
3 Early Initiation of Antenatal Care and Factors Associated with Early  
4 Antenatal Care Initiation at public Health Facilities at resource limited  
5 setting, 2021.  
6  
7  
8  
9

10  
11 **Eskahun Ambaye<sup>1</sup>, Zegeye Regasa<sup>1</sup>and Gizaw Hayiliye<sup>1</sup>**  
12  
13

14  
15  
16  
17  
18  
19 **AUTHORS NAME**

**EMAIL ADDRESS**

- 20  
21  
22 1. Eskahun Ambaye.....eskahunambaya@gmail.com  
23 2. Gizaw Hayiliye.....ghailiye463@gmail.com  
24  
25  
26  
27

28 **CORRESPONDING AUTHOR**

- 29  
30  
31 3. Zegeye Regasa.....zegeyerega@gmail.com  
32  
33  
34  
35

36 **Author's details/affiliations**

- 37 1. College of Medicine and Health Sciences Institute of Public Health, Department of Health  
38 Informatics, Debre Markos university, Debre Markos ,Ethiopia  
39  
40  
41  
42  
43  
44  
45  
46  
47  
48  
49  
50  
51  
52  
53  
54  
55  
56  
57  
58  
59  
60

## Abstract

**Objectives:** Early initiation of antenatal care services is one of essential ways to detect, manage and prevent adverse outcomes of pregnancy. Even though significant numbers of pregnant mothers were initiating the follow up on the recommended time in developed countries, it remains unacceptably low in low income countries including Ethiopia. The aim of the study was to assess the proportion and factors associated for early initiation of antenatal care follow up among pregnant women attending antenatal care service at Bahir Dar Zuria Special zone public health centers, Bahir Dar, Ethiopia.

**Method:** An institutional based cross sectional study was conducted from Dec, 15/2020 to March 1, 2021. A total of 592 participants were selected using systematic random sampling method and participated on the study. Data were collected through structured and pre tested questioners. Binary Logistic regression models were also used to identify factors associated with early initiation of antenatal care services.

**Result:** The study showed that 48.6% of the participants were started their first antenatal care services before 16 weeks of gestation. Family size less than five (AOR= 2.0, 95% CI; 1.25-3.25), urban residence (AOR=3.0,95%CI;1.48,6.17), secondary education (AOR=2.1,95%CI;1.3-3.6), college level and above (AOR=3.5,95%CI;1.8-6.8), primi gravida (AOR=2.6,95%CI;1.65-4.14), planned pregnancy (AOR=3.5,95%CI;1.5-8.1) and knowledge on early initiation of 1<sup>st</sup> ANC (AOR= 1.7, 95%CI; 1.14-2.55), were significantly associated with early initiation of first antenatal care.

**Conclusion and recommendation:** the study showed that more than half of the participants were not initiate their ANC service timely. Family sizes, residence, educational status of women, gravidity, were among factors significantly associated with early initiation of antenatal care service. Additionally dissemination of information about recommended time to initiate ANC services and cooperative effort to improve women's educational status to increase knowledge on early initiation of first antenatal care has to be conducted.

**Keywords:** Antenatal care, early initiation, pregnancy

### Strength and limitation of the study

- The study was done based on the data collected from different five health centers to ensure representativeness and to obtain reliable estimates, and therefore the study findings have the potential to inform policymakers and programmers and also aid in designing appropriate interventions at zonal and regional levels.
- The study didn't include private health facilities instead only use governmental public health facilities data so pregnant mothers from private facilities were not included

## Introduction

The physiological symptoms of pregnancy and the symptoms of pregnancy-related complications are sometimes difficult to differentiate. Pregnancy-related complications are risky health conditions that occur during pregnancy, it can involve the mother's and the child's health. Sometimes, health conditions the woman had before she became pregnant can lead to complications during pregnancy and Some women have health conditions that arise during pregnancy(1,2).

To avert the problems, various maternal health care services are being provided. Among those services, Antenatal care(ANC) service is one of essential and key strategies for reducing maternal and neonatal morbidity and mortality directly through detection and treatment of pregnancy-related illnesses (2)(3). Early initiation of ANC visits enables health care providers to diagnose early pregnancy related complications and institute timely and appropriate interventions (4). According to World Health Organization (WHO) recommendation pregnant women in developing countries have to get at least four ANC visits, and initiate early ANC follow up (2).

Huge progress has been made globally, however still maternal health is a global agenda. WHO 2019 report shows about 295 000 maternal deaths occurred in the globe due to pregnancy and childbirth related complications among those deaths 94% of all maternal deaths occur in low and lower-middle-income countries.(1,5) Sub-Saharan Africa and Southern Asia accounted for approximately 86% of the estimated global maternal deaths in 2017 (5).

Many maternal and prenatal deaths occur in women who have not received timely, inadequate and no utilization of ANC (3). Early antenatal care attendance during the first three months of gestation plays a major role in detecting and treating complications that occur during pregnancy (6). In Ethiopia 412 maternal deaths per 100,000 live birth occur in 2016 due to pregnancy or childbirth related complications and targeted reduction to 199/100,000 live births by 2020, EDHS (4).

Despite ANC is provided free of charge and there is increased accessibility, but early initiation of ANC is still a major problem (7). The Only 28% of women had their first ANC during the first trimester, while 43% of women in urban areas receive ANC within their first trimester of pregnancy, compared with 22% of those in rural areas, EDHS(8). Early initiation of ANC has

1  
2  
3 many benefits, like comprehensive health assessments including maternal baselines data such as  
4 weight, blood pressure, urinalysis will be assessed and have a direct relation with good prenatal  
5 outcome for the mother and unborn fetus, and leads to delivery of healthy baby. Not attending  
6 ANC service early has increased the risk of poor pregnancy outcomes, maternal and neonatal  
7 mortality. Maternal education, previous history of early booking, age, and perception on  
8 frequency of ANC visit per pregnancy were significantly associated with the early ANC visit,  
9 awareness creation and strengthening on the importance of the early ANC visit need to be  
10 emphasized at the time of service provision(9,10).

11  
12  
13  
14  
15  
16  
17  
18 Numbers of activities were done by the government to improve the early initiation of antenatal  
19 care in Ethiopia. Among those activities enhanced coordination of health extension workers,  
20 health development army , extended supportive supervision systems at national, regional, zonal,  
21 woreda, primary health care unit and community levels on maternal health services including  
22 early ANC initiation were the major activities.(11).

23  
24  
25  
26  
27 However, the factors associated with early initiation of ANC are not the same across  
28 different cultures, socio economic status and distance/access to health institution within a  
29 society. Thus assessing the factors associated for early initiation of ANC follow up in  
30 different set up is important to improve maternal health services. Therefore, this study aimed  
31 at determining the magnitude, know information gaps on the early initiation of ANC and  
32 identify factors associated with it among pregnant women attending antenatal clinic in public  
33 health centers in Bahir Dar Zuria Special Zone, Ethiopia.

## 34 35 36 37 38 39 **Methods**

### 40 41 42 **Study area**

43  
44  
45 Institutional based cross-sectional study was conducted in Bahir Dar Zuria special zone from  
46 December, 15, 2020 to march 1, 2021. A total population of Bahir Dar city estimated to be  
47 345,084 and 81,371 of them are women of reproductive age group. The city currently has 3  
48 governmental hospitals, 4 private hospitals, 10 governmental health centers, 10 health posts, and  
49 more than 39 private clinics. Most health facilities in the city provide ANC services. There are  
50 more than 405 health care providers including health extension working at health centers of  
51 Bahir Dar city administration, among those 47 are midwives. Out of the total female population



1  
2  
3 11629 pregnancies is expected in 2020 Gregorian calendar. According to the 2020 Gregorian  
4 calendar annual zonal report, the antenatal coverage in the study area was 100% (3,4,12)

5  
6 The study was conducted in five public health centers (Han HC, Shimbit HC, Dagmawi Minilik  
7 HC, Shumabo HC and Meshentie HC).  
8  
9

## 10 **Study variables**

### 11 **Dependent variables**

12  
13  
14  
15  
16 ANC initiation –early/late

### 17 **Independent variables**

18  
19 Socio-demographic and economic factors: maternal age, educational status, occupation,  
20 marital status, ethnicity, religion, income, family size and residence, husband educational

21  
22 Pregnancy & maternal related factors: gravidity, history of abortion, health status of present  
23 pregnancy/danger sign, plan of pregnancy/unwanted pregnancy, past experience of antenatal  
24 care utilization, knowledge and awareness on timing of first antenatal care and Previous  
25 pregnancy complication  
26  
27  
28

29  
30 **Behavioral factors:** information access, free of pain, access to media and distance of health  
31 facilities  
32

### 33 **Source population**

34  
35 All pregnant women attending antenatal care service in public health centers of Bahir Dar  
36 city  
37

### 38 **Study population**

39  
40 All pregnant women attending their antenatal care service in public health centers of Bahir  
41 Dar Zuria Special Zone during the data collection period.  
42

### 43 **Inclusion criteria**

44  
45 Pregnant women attending antenatal care service were included to the study  
46

### 47 **Exclusion criteria**

48  
49 Women who have either unknown gestational age or not having ultrasound result or not  
50 known with physical examination and pregnant women who had danger signs of  
51 pregnancy/seriously ill were excluded from this study.  
52  
53  
54  
55  
56  
57  
58  
59  
60

### Sampling Technique/ Procedure

To select participants, systematic random sampling techniques were applied. The total sample size was proportionally allocated from the randomly selected five health centers based on their ANC loads. By considering; N (total pregnant woman who came for first ANC visit in previous two months in five health centers = 971), n (calculated sample size = 610) and k-interval  $K = N/n, = 971/610 = 2$ , the first client was selected by lottery method among the first two ANC service users in each health centers. n = sample size allocated to each health centers, N = number of ANC clients in a health center in previous two month's performance (Han health center = 349, Shimbit health center = 200, Dagmawi Minilik health center = 251, Shumabo health center = 98 and Meshentie health center = 73). Then the final sample size proportionally allocated for each health centers.

### Sample Size Determination

The sample size was calculated using single population proportion formula. Taking 46.8% prevalence of early initiation of antenatal care from previous study(13). With an assumption of 95% confidence interval ( $z=1.96$ ), 5% margin of error ( $d=0.05$ ), 10% nonresponse rate and 1.5 design effect.

$$n = (Z\alpha/2)^2 P(1-P)/d^2 \quad n = (1.96)^2 0.468(1-0.468)/0.05^2 = 381$$

Where, n-sample size

$Z\alpha/2$ - Z value at 95% level of confidence [1.96]

P- is the proportion of early initiation of ANC

d- the margin of error at 95% confidence interval

By considering the 10% non-response rate  $381 \times 10/100 = 38$

Final sample size was  $381 \times 1.5 + 38 = 610$

### Operational definitions

*Antenatal care*- is Pregnancy related services given by skilled health care providers starting from conception up to the onset of labor (2,14,15)

*Early antenatal care*- is the first antenatal care received as soon as the pregnancy is suspected till 16 weeks of gestation (16–18).

### **Data Collection Tool and Methods**

Data related to socio-demographic, economic factors, pregnancy, maternal related factors and behavioral factors were collected by using a pretested and semi structured questionnaire. The questionnaire was first developed in English and later translated into Amharic and finally re-translated back to English to check its consistency. Training was given to the supervisors and data collectors for two days by the principal investigator on the details of the questionnaire. Pretest was done in a public health centers that is not selected for the study. The interview was conducted in Amharic. Eligible mothers are interviewed face-to-face at exist of antenatal care clinic. The interview was conducted by 4 midwives and supervised by 2-degree holder health professionals.

### **Data Management and Analysis**

The data were entered, coded and cleaned using EPI data version 4.6. After completion of entry the data were export to SPSS version 23 for analysis. Missing data were managed by observing cross tabulation results percentages. Bi-variable logistic regression was used to identify the association between independent variables and dependent variables, variables with p-value of less than 0.2 will be entered for multi-variable logistic regression analysis to determine various factors on the outcome variable and to control confounding effect. Adjusted odds ratio (AOR) with 95% confidence interval (CI) was used to identify the independent predictors of early initiation of antenatal care. P values less than 0.05 were taken as statistically significance. Model fitness was tested by using Hosmer-Lemeshow Goodness of fit test.

### **Data Quality Assurance**

To ensure the quality of this research training were given to data collectors and supervisors. Pretest were carried out in 5% of sample size prior to actual data collection out of the study area, to assess the validity of the questionnaire to check clarity of questions, ambiguity, arrangement of questions, order & options for the questions and skipping pattern accordingly. The whole data collection procedures were closely supervised by field supervisors and investigators to ensure the completeness and reliability of the gathered information throughout the data collection process.

### **Patient and public involvement**

neither patients nor the public were involved in the design, planning, conduct or reporting of this study.

## Ethical Considerations

Ethical clearance was obtained from Yom post graduate college department of project planning and management, Research Ethical review board with reference ID.. YC//207//2013. A legal official letter was submitted to the Bahir Dar city administration health department office to obtain their permission. Confidentiality of the data was maintained by using the data only for the study purpose and keeping the data from third party.

## Result

In this study a total of 610 participants with 97% (592) response rate were participated. Among the total pregnant women whose data were analyzed 85.7% of the respondents were followers of Orthodox Christian religion. The age of the respondents ranged from 17 to 45 years with a mean age of 26.31 (SD 4.72 years). More than three-fourth 80.3 % (476) of them were resides in urban areas and 50% (297) were house wife. The majority of the respondents 98.1% (581) were married. 61.3% (366) of respondents were attended secondary and above in their educational level. More than half of the respondents 56.7 % ( 337) were get information from their families to start first antenatal care follow up. 57.6% (341) of respondents were multi-gravida and the mean gestational age of the respondents was 16.01 (SD 6.18) weeks and among those respondents two hundred seventy-eights (46.8%) had antenatal follow up in their previous pregnancies and five hundred forty-seven (92.1%) of pregnancies were planned. 13.7%(81) of the respondent had history of abortion. 51.5% (305) of respondent had knowledge on the timing of first ANC and 59.6% (353) of respondent had knowledge on the frequency of antenatal care follow up.(table 1, table 2, table 3)

**Table 1: The socio- demographic characteristics of the pregnant women selected public health center in Bahir Dar special zone, 2021(n=592)**

| Variables | Characteristics | Frequency | Percent |
|-----------|-----------------|-----------|---------|
| Age       | >25             | 293       | 49.5    |
|           | ≥25             | 299       | 50.5    |
| Residence | Urban           | 476       | 80.3    |
|           | Rural           | 116       | 19.6    |

|    |                           |                         |     |      |
|----|---------------------------|-------------------------|-----|------|
| 1  |                           |                         |     |      |
| 2  |                           |                         |     |      |
| 3  |                           | Orthodox                | 508 | 85.7 |
| 4  | <b>Religion</b>           | Muslim                  | 67  | 11.3 |
| 5  |                           | Protestant              | 17  | 2.9  |
| 6  |                           |                         |     |      |
| 7  |                           |                         |     |      |
| 8  |                           |                         |     |      |
| 9  | <b>Educational status</b> | Primary                 | 229 | 38.7 |
| 10 | <b>of women</b>           | Secondary & preparatory | 208 | 35.1 |
| 11 |                           | College and above       | 155 | 26.2 |
| 12 |                           |                         |     |      |
| 13 |                           |                         |     |      |
| 14 | <b>Women occupation</b>   | House wife              | 297 | 50.2 |
| 15 |                           | Farmer                  | 91  | 15.4 |
| 16 |                           | Employed Gov't/NGO      | 117 | 19.8 |
| 17 |                           | Merchant                | 87  | 14.7 |
| 18 |                           |                         |     |      |
| 19 |                           |                         |     |      |
| 20 |                           |                         |     |      |
| 21 | <b>Monthly income</b>     | <2000                   | 100 | 16.9 |
| 22 |                           | >=2000                  | 492 | 83.1 |
| 23 |                           |                         |     |      |
| 24 |                           |                         |     |      |
| 25 |                           |                         |     |      |
| 26 | <b>Marital status</b>     | Married                 | 581 | 98.1 |
| 27 |                           | Unmarried/cohabitation  | 11  | 1.9  |
| 28 |                           |                         |     |      |
| 29 |                           |                         |     |      |
| 30 | <b>Husband</b>            | Primary                 | 170 | 28.7 |
| 31 | <b>educational status</b> | Secondary & preparatory | 199 | 33.6 |
| 32 |                           | College and above       | 211 | 35.6 |
| 33 |                           |                         |     |      |
| 34 |                           |                         |     |      |
| 35 |                           |                         |     |      |
| 36 | <b>Means of</b>           | On foot                 | 207 | 35   |
| 37 | <b>transportation</b>     | Taxi/Bajaj              | 385 | 65   |
| 38 |                           |                         |     |      |
| 39 |                           |                         |     |      |
| 40 | <b>Family size</b>        | < 5                     | 395 | 66.7 |
| 41 |                           | ≥ 5                     | 197 | 33.3 |
| 42 |                           |                         |     |      |
| 43 |                           |                         |     |      |
| 44 | <b>Distance to reach</b>  | <30 minutes             | 181 | 30.6 |
| 45 | <b>HC on foot came</b>    | >30 minutes             | 17  | 2.9  |
| 46 |                           |                         |     |      |
| 47 |                           |                         |     |      |
| 48 |                           |                         |     |      |
| 49 | <b>Cost of transport</b>  | <3 birr                 | 12  | 2    |
| 50 |                           | 3-9 birr                | 220 | 37.2 |
| 51 |                           | >9 birr                 | 147 | 24.8 |
| 52 |                           |                         |     |      |
| 53 |                           |                         |     |      |
| 54 |                           |                         |     |      |
| 55 |                           |                         |     |      |
| 56 |                           |                         |     |      |
| 57 |                           |                         |     |      |
| 58 |                           |                         |     |      |
| 59 |                           |                         |     |      |
| 60 |                           |                         |     |      |

**Table 2: Obstetric characteristics of pregnant women in selected public health centers of Bahir Dar special zone, 2021(n=592)**

| Variables                           | Description | Frequency | Percent |
|-------------------------------------|-------------|-----------|---------|
| <b>Gravida</b>                      | One         | 251       | 42.4    |
|                                     | Two & above | 341       | 57.6    |
| <b>History of abortion</b>          | Yes         | 81        | 13.7    |
|                                     | No          | 511       | 86.3    |
| <b>Minor disorders of pregnancy</b> | Yes         | 140       | 23.6    |
|                                     | No          | 452       | 76.4    |

**Table 3: Previous pregnancy and knowledge's of pregnant women related factors in public health centers of Bahir Dar special zone, 2021 (n = 592)**

| Variables                                         | Characteristics   | Frequency | Percent |
|---------------------------------------------------|-------------------|-----------|---------|
| <b>Had ANC follow up in your last px.</b>         | Yes               | 278       | 46.8    |
|                                                   | No                | 46        | 7.7     |
| <b>Place of delivery who had previous birth</b>   | Home              | 47        | 7.9     |
|                                                   | Health facilities | 265       | 44.8    |
| <b>Rout of delivery who had previous birth</b>    | SVD               | 243       | 41      |
|                                                   | C/S               | 69        | 11.7    |
| <b>Outcome of last birth</b>                      | Alive             | 298       | 50.3    |
|                                                   | Still birth       | 14        | 2.4     |
| <b>Knowledge on early initiation of first ANC</b> | <16wk             | 304       | 51.5    |
|                                                   | ≥16wk             | 288       | 48.5    |

|                           |      |     |      |
|---------------------------|------|-----|------|
| <b>Frequencies for</b>    | Once | 10  | 1.7  |
| <b>ANC follow up</b>      | 2-3  | 212 | 35.8 |
|                           | ≥4   | 353 | 59.6 |
| <b>ANC service reduce</b> | Yes  | 518 | 87.5 |
| <b>PMTCT</b>              | No   | 74  | 12.5 |

### Factors Associated with Early Initiations of First ANC Visit

Bi-variable analysis showed that Age of women, residency, educational status of women, occupation of women, monthly income, means of transportation, gravidity, knowledge on early initiation of first ANC, family size, plan of pregnancy and minor disorders of current pregnancy were candidate variable for multivariable analysis. On multivariable analysis family size, gravidity, residence, educational status of women, plan of pregnancy and knowledge on early initiation of first ANC, were true determinants of early initiation of first ANC visit at the p-value less than 0.05. The findings showed that those family size less than five were 2 times more likely to initiate early ANC than those family size is greater than five (AOR= 2.0, 95% CI; 1.25-3.25), those urban residence were 3 times more likely to initiate early than those residence were rural (AOR=3.0,95%CI;1.48,6.17), respondents with college level and above were 3.5 times more likely to initiate early ANC as compared to those with primary school (AOR=3.5, 95% CI; 1.8-6.8), those with secondary education are 2.1 times more likely to initiate than those with primary education(AOR=2.1,95%CI;1.3-3.6). respondents with primi gravida were 2.6 times more likely to initiate early than those respondents who had multigravida (AOR=2.6,95%CI;1.65-4.14), respondents with planned pregnancy were 3.5 times more likely to initiate early than those respondents with unplanned pregnancy(AOR=3.5,95%CI;1.5-8.1) and respondents who had knowledge on early initiation of first ANC were more likely to start early as compared to their counterparts (AOR= 1.7, 95%CI; 1.14-2.55), were significantly associated with early initiation of antenatal care. (Table 4).

**Table 4: Factors association with early initiation of ANC, public health centers of Bahir Dar special zone, 2021(n=592)**

| Variables                            | Early initiation |     | Odds ratio     |                   |
|--------------------------------------|------------------|-----|----------------|-------------------|
|                                      | Yes              | No  | COR(95%CI)     | AOR(95%CI)        |
| <b>Age of women</b>                  |                  |     |                |                   |
| <25                                  | 113              | 180 | 2.8(2.0-3.9)   | 1.0(0.54-1.8)     |
| ≥25                                  | 191              | 108 | 1              | 1                 |
| <b>Residence</b>                     |                  |     |                |                   |
| Urban                                | 201              | 275 | 10.8(5.9-19.8) | 3.0(1.48-6.17) ** |
| Rural                                | 103              | 13  | 1              | 1                 |
| <b>Education of women</b>            |                  |     |                |                   |
| Primary                              | 177              | 52  | 1              | 1                 |
| Secondary                            | 85               | 123 | 4.9(3.25-7.45) | 2.1(1.3-3.6) **   |
| College/above                        | 42               | 113 | 9.1(5.7-14.6)  | 3.5(1.8-6.8)**    |
| <b>Occupation of women</b>           |                  |     |                |                   |
| House wife                           | 152              | 132 | 0.67(0.44-1.0) | 1.1(0.71-2.01)    |
| Farmer                               | 76               | 27  | 0.27(0.1-0.48) | 0.51(0.25-1.01)   |
| Employed                             | 23               | 61  | 2.0(1.1-3.76)  | 1.3(0.6-2.74)     |
| Merchant                             | 53               | 68  | 1              | 1                 |
| <b>Monthly income</b>                |                  |     |                |                   |
| <2000 birr                           | 76               | 24  | 1              | 1                 |
| ≥2000 birr                           | 228              | 264 | 3.6(2.24-5.99) | 1.09(0.57-2.07)   |
| <b>Means of transport</b>            |                  |     |                |                   |
| On foot                              | 129              | 78  | 1              | 1                 |
| Taxi/Bajaj                           | 175              | 210 | 1.98(1.4-2.8)  | 1.4(0.93-2.13)    |
| <b>Gravida</b>                       |                  |     |                |                   |
| One                                  | 78               | 173 | 4.3(3.0-6.1)   | 2.6(1.65-4.14) ** |
| Two and above                        | 226              | 115 | 1              | 1                 |
| <b>knowledge on early initiation</b> |                  |     |                |                   |
| <16wk                                | 192              | 175 | 1.2(1.06-1.75) | 0.37(0.27-0.5) ** |
| ≥16wk                                | 112              | 113 | 1              | 1                 |
| <b>Family size</b>                   |                  |     |                |                   |



|                              |     |     |                |                   |
|------------------------------|-----|-----|----------------|-------------------|
| <5                           | 163 | 232 | 3.5(2.4-5.1)   | 2.0(1.25-3.25) ** |
| >=5                          | 141 | 56  | 1              | 1                 |
| <b>Plan of pregnancy</b>     |     |     |                |                   |
| Yes                          | 268 | 279 | 4.1(1.9-8.8)   | 3.5(1.5-8.1) **   |
| No                           | 36  | 9   | 1              | 1                 |
| <b>Minor disorders of px</b> |     |     |                |                   |
| Yes                          | 16  | 23  | 1.56(0.8-3.02) | 1.3(0.57-3.0)     |
| No                           | 288 | 265 | 1              | 1                 |

*N.B I=Reference category \*= significant at P<0.0.5, \*\*=significant at P<0.001.*

## Discussion

This study aimed to assess the proportion of early booking of antenatal care at public health facilities found in Bahir dar special zone. Additionally it targeted to identify factors associated with early initiation of ANC across Bahir dar Zone. Based on WHO recommendation pregnant women have to start first ANC booking within First trimesters. In Ethiopia due to high governmental effort the proportion of women with the recommended four or more ANC visits increased from 12% in 2005 to 43% in 2019. During this same time period, the proportion of women who received ANC in the first trimester increased from 6% to 28% (8).

Only 48.6% pregnant women were started their First ANC Visit within the recommended time in the study area. This finding is in line with prior studies conducted in southern Ethiopia 49.7%(12), Adigrat town, Tigray Ethiopia 48.2% (19) and Addis Zemen south Gondar, Ethiopia 47.5%(20). The proportion of early initiation of ANC was higher than the report of Mini Ethiopian demographic health survey conducted in 2019 which was only 28%. The variation between these finding could be due to EDHS covered more remote areas where as health centers could be a major predictor of ANC service (8). However the proportion of this study is less than study conducted in Addis Ababa which was 58% of the women started their visit within first trimesters (21). This difference might be due to Addis Ababa is the capital of the country and the community there might have better health awareness than the study area.

Maternal education was the major significant factor in multivariable analysis, Mothers with college degree and above were 3.5 times and mother with secondary school and above were 2.1 times more likely to initiate ANC service with the recommended time than mothers with only

1  
2  
3 primary school. This finding was similar with study conducted at wollita sodo zone  
4 Ethiopia(17), and Myanmar(14). This might be due to mothers with high level education may  
5 have knowledge about what is necessary during pregnancy, the importance of ANC and  
6 importance of early initiate the service.  
7  
8  
9

10  
11 Pregnant women who had knowledge on early initiation of first ANC were 0.37 times more  
12 likely to initiate early as compared to their counterparts and this finding was consistent with the  
13 studies conducted in Addis Zemen hospital(20), central zone of Tigray (22) , study conducted in  
14 Benshanigul (23)and Ghana(24). This might be due to mothers with poor ANC knowledge may  
15 not have enough awareness about the importance of early initiate of ANC and also may not know  
16 time to initiate the services.  
17  
18  
19  
20  
21

22  
23 Planned pregnancy also found to be a significant factor for early initiation of ANC, pregnant  
24 women with planned pregnancy were 3.5 times more likely to initiate early ANC than their  
25 counter part. This finding is consistent with studies from eastern zone Tigray(25) and Mandalay,  
26 Myanmar(14), this may be due to that timing of ANC affected by decision the women make  
27 during pregnancy, so it takes time starting from accepting the pregnancy itself to acknowledging  
28 the need for ANC.  
29  
30  
31  
32

33  
34 Place of residence also has a great impact on time to initiate ANC booking, the study showed  
35 that women reside in urban were 3 times more likely to initiate ANC follow up compare to  
36 women reside in rural this result is consistence with those studies undertaken in 2019 Mini  
37 EDHS(8) and Mandalay, Myanmar(14). The possible reason for this finding is that women reside  
38 in urban has the chance to access health facilities nearby than women reside in rural.  
39  
40  
41  
42  
43

#### 44 **Conclusions and Recommendations**

45  
46 The study showed that more than half of the participants were not initiate their ANC service  
47 timely. Family size, residence, educational status of women, gravidity, plan of pregnancy and  
48 knowledge on early initiation of first ANC were factors significantly associated with early  
49 initiation of antenatal care service. Additionally dissemination of information about  
50 recommended time to initiate ANC services and cooperative effort to improve women's  
51 educational status to increase knowledge on early initiation of first antenatal care has to be  
52 conducted.  
53  
54  
55  
56  
57

## Abbreviations

ANC: antenatal care; HC: health centers; CSA: Central statistics agency; EDHS: Ethiopian demographic and health survey; IRB: Institutional Review Board; FMOH: Federal Ministry of Health; MM: maternal mortality; WHO: World Health Organization;

## Acknowledgements

The authors gratefully acknowledge Yom Post Graduate College in providing the opportunity to conduct this research for academic purpose.

## Availability of data and materials

The datasets during and/or analyzed during the current study is available from the corresponding author on reasonable request.

## Authors' contributions

Proposal preparation, acquisition of data, analysis and Interpretation of data was done by EA (principal investigator). Drafting the article, revising it critically for intellectual content, and final approval of the version to be published was done by EA, ZR and GH. All authors read and approved the final manuscript.

## Competing interests

The authors declare that they have no competing interests.

## Funding

The authors have not declared a specific grant for this research from any funding agency in the public, commercial or not-for-profit sectors.

## Ethical Considerations

Ethical clearance was obtained from Yom post graduate college department of project planning and management, Research Ethical review board with reference ID YC//207//2013. A legal official letter was submitted to the Bahir Dar city administration health department office to obtain their permission. Confidentiality of the data was maintained by using the data only for the study purpose and keeping the data from third party.

## References

1. Pregnancy Complications | Maternal and Infant Health | CDC [Internet]. [cited 2022 Feb 1]. Available from: <https://www.cdc.gov/reproductivehealth/maternalinfanthealth/pregnancy-complications.html>
2. Lincetto O, Mothebesoane-Anoh S, Gomez P, Munjanja S. Antenatal Care III: page 1-2
3. Kahasse G, Alemayehu W. Factors associated with late ANC initiation among pregnant women in select public health centers of Addis Ababa , Ethiopia : unmatched case – control study design. *Pragmatic Obs Res*. 2017;223–30.
4. La A, Ma T. Initiation of Antenatal Care and Associated Factors among Pregnant Women in Public Health Centers in Addis Ababa , Ethiopia. :1–6.
5. Maternal mortality [Internet]. [cited 2020 Sep 24]. Available from: <https://www.who.int/news-room/fact-sheets/detail/maternal-mortality>
6. Tegegne TK, Chojenta C, Getachew T, Smith R, Loxton D. Antenatal care use in Ethiopia: A spatial and multilevel analysis. *BMC Pregnancy Childbirth*. 2019;19(1):V.
7. Gebremeskel F, Dibaba Y, Admassu B. Timing of First Antenatal Care Attendance and Associated Factors among Pregnant Women in Arba Minch Town and Arba Minch District, Gamo Gofa Zone, South Ethiopia. *J Environ Public Health*. 2015;2015.
8. Ethiopian Public Health Institute (EPHI), ICF. Ethiopia Mini Demographic and Health Survey 2019: Final Report [Internet]. 2021. 1–207 p. Available from: <https://dhsprogram.com/pubs/pdf/FR363/FR363.pdf>
9. SH H, ES M, MG D. Timely Initiation of First Antenatal Care Visit of Pregnant Women Attending Antenatal Care Service. *J Women’s Heal Care*. 2016;05(06).
10. Wolde F, Mulaw Z, Zena T, Biadgo B, Limenih MA. Determinants of late initiation for antenatal care follow up: The case of northern Ethiopian pregnant women. *BMC Res Notes*. 2018;11(1):1–7.
11. Bekele A, Bekele T, Snetro-Plewman G, Tesfaye S, Worku A. Community-Based Care in Ethiopia Implementing a Demand Creation Strategy for Improved Maternal, Newborn, and Child Health Outcomes Authors. Available from: [www.mcsprogram.org](http://www.mcsprogram.org)
12. Abuka T, Alemu A. Assessment of Timing of First Antenatal Care Booking and Associated Factors among Pregnant Women who attend Antenatal Care at Health Facilities in Dilla town, Gedeo Zone, Southern Nations, Nationalities, and Peoples Region, Ethiopia, 2014. *J Pregnancy Child Heal*. 2016;3(3).
13. Alemu Y, Aragaw A. Early initiations of first antenatal care visit and associated factor among mothers who gave birth in the last six months preceding birth in Bahir Dar Zuria Woreda North West Ethiopia. *Reprod Health*. 2018;15(1):1–8.
14. Aung T, Oo W, Khaing W, Lwin N, Dar H. Late initiation of antenatal care and its determinants: a hospital based cross-sectional study. *Int J Community Med Public Heal*. 2016;3(4):900–5.
15. Tekelab T, Chojenta C, Smith R, Loxton D. Factors affecting utilization of antenatal care in Ethiopia: A systematic review and metaanalysis. *PLoS One*. 2019;14(4):1–24.

16. Gebresilassie B, Belete T, Tilahun W, Berhane B, Gebresilassie S. Timing of first antenatal care attendance and associated factors among pregnant women in public health institutions of Axum town, Tigray, Ethiopia, 2017: A mixed design study. *BMC Pregnancy Childbirth*. 2019;19(1):1–12.
17. Maycas Dembelu, Abigia Samuel, Kostir Andarge ST and MK. Assessment of Timely Initiation of First ANC Visit and Associated factors among pregnant mothers in wolita soddo public health facilities. 2013;(1):1–11.
18. Abebe T, Letta S, Gebrehana E, Feyera B. Timely Booking and Factors Associated with First Antenatal Care Attendance among Pregnant Women in Public Health Centers , Addis Ababa. 2017;1:21–8.
19. Lerebo W. Magnitude and Associated Factors of Late Booking for Antenatal Care in Public Health Centers of Adigrat Town, Tigray, Ethiopia. *Clin Mother Child Heal*. 2015;12(1):1–8.
20. Wolde HF, Tsegaye AT, Sisay MM. Late initiation of antenatal care and associated factors among pregnant women in Addis Zemen primary hospital, South Gondar, Ethiopia. *Reprod Health*. 2019;16(1):1–8.
21. Gulema H, Berhane Y. Timing of First Antenatal Care Visit and its Associated Factors among Pregnant Women Attending Public Health Facilities in Addis Ababa, Ethiopia. *Ethiop J Health Sci*. 2017;27(2):139–46.
22. Grum T, Brhane E. Magnitude and factors associated with late antenatal care booking on first visit among pregnant women in public health centers in central zone of Tigray Region, Ethiopia: A cross sectional study. *PLoS One*. 2018;13(12):1–9.
23. Chimdessa BA, Estifanos N, Markos J. Magnitude of Late ANC Booking and its Determinant Factors among Pregnant Women Attended Public Health Centers and Private Clinic in Artumafursi District, Amhara Regional State, Special Zone of Oromia, Ethiopia. *Glob J Med Res*. 2019;19(1):1–8.
24. Ekholuenetale M, Nzopotam CI, Barrow A. Prevalence and socioeconomic inequalities in eight or more antenatal care contacts in Ghana: Findings from 2019 population-based data. *Int J Womens Health*. 2021;13:349–60.
25. Weldearegawi GG, Teklehaimanot BF, Gebru HT, Gebrezgi ZA, Tekola KB, Baraki MF. Determinants of late antenatal care follow up among pregnant women in Easter zone Tigray, Northern Ethiopia, 2018: unmatched case-control study. *BMC Res Notes [Internet]*. 2019;12(1):1–9. Available from: <https://doi.org/10.1186/s13104-019-4789-8>

STROBE—Checklist is used for this study

|                              | Item No | Recommendation                                                                                                                                                                                               | Page No |
|------------------------------|---------|--------------------------------------------------------------------------------------------------------------------------------------------------------------------------------------------------------------|---------|
| <b>Title and abstract</b>    | 1       | (a) Indicate the study's design with a commonly used term in the title or the abstract<br>(b) Provide in the abstract an informative and balanced summary of what was done and what was found                | II      |
| <b>Introduction</b>          |         |                                                                                                                                                                                                              |         |
| Background/rationale         | 2       | Explain the scientific background and rationale for the investigation being reported                                                                                                                         | 2       |
| Objectives                   | 3       | State specific objectives, including any prespecified hypotheses                                                                                                                                             |         |
| <b>Methods</b>               |         |                                                                                                                                                                                                              |         |
| Study design                 | 4       | Present key elements of study design early in the paper                                                                                                                                                      | 3       |
| Setting                      | 5       | Describe the setting, locations, and relevant dates, including periods of recruitment, exposure, follow-up, and data collection                                                                              | 3       |
| Participants                 | 6       | (a) Give the eligibility criteria, and the sources and methods of selection of participants                                                                                                                  | 3       |
| Variables                    | 7       | Clearly define all outcomes, exposures, predictors, potential confounders, and effect modifiers. Give diagnostic criteria, if applicable                                                                     | 3       |
| Data sources/<br>measurement | 8*      | For each variable of interest, give sources of data and details of methods of assessment (measurement). Describe comparability of assessment methods if there is more than one group                         | 4       |
| Bias                         | 9       | Describe any efforts to address potential sources of bias                                                                                                                                                    |         |
| Study size                   | 10      | Explain how the study size was arrived at                                                                                                                                                                    | 5       |
| Quantitative variables       | 11      | Explain how quantitative variables were handled in the analyses. If applicable, describe which groupings were chosen and why                                                                                 | 6       |
| Statistical methods          | 12      | (a) Describe all statistical methods, including those used to control for confounding                                                                                                                        | 6       |
|                              |         | (b) Describe any methods used to examine subgroups and interactions                                                                                                                                          | 6       |
|                              |         | (c) Explain how missing data were addressed                                                                                                                                                                  | 6       |
|                              |         | (d) If applicable, describe analytical methods taking account of sampling strategy                                                                                                                           | 6       |
|                              |         | (e) Describe any sensitivity analyses                                                                                                                                                                        | 6       |
| <b>Results</b>               |         |                                                                                                                                                                                                              |         |
| Participants                 | 13*     | (a) Report numbers of individuals at each stage of study—eg numbers potentially eligible, examined for eligibility, confirmed eligible, included in the study, completing follow-up, and analysed            | 7       |
|                              |         | (b) Give reasons for non-participation at each stage                                                                                                                                                         |         |
|                              |         | (c) Consider use of a flow diagram                                                                                                                                                                           |         |
| Descriptive data             | 14*     | (a) Give characteristics of study participants (eg demographic, clinical, social) and information on exposures and potential confounders                                                                     | 7&8     |
|                              |         | (b) Indicate number of participants with missing data for each variable of interest                                                                                                                          | 7       |
| Outcome data                 | 15*     | Report numbers of outcome events or summary measures                                                                                                                                                         | 7,8&9   |
| Main results                 | 16      | (a) Give unadjusted estimates and, if applicable, confounder-adjusted estimates and their precision (eg, 95% confidence interval). Make clear which confounders were adjusted for and why they were included | 10      |

|                          |    |                                                                                                                                                                            |       |
|--------------------------|----|----------------------------------------------------------------------------------------------------------------------------------------------------------------------------|-------|
|                          |    | (b) Report category boundaries when continuous variables were categorized                                                                                                  |       |
|                          |    | (c) If relevant, consider translating estimates of relative risk into absolute risk for a meaningful time period                                                           | 11    |
| Other analyses           | 17 | Report other analyses done—eg analyses of subgroups and interactions, and sensitivity analyses                                                                             | 11    |
| <b>Discussion</b>        |    |                                                                                                                                                                            |       |
| Key results              | 18 | Summarise key results with reference to study objectives                                                                                                                   | 12    |
| Limitations              | 19 | Discuss limitations of the study, taking into account sources of potential bias or imprecision. Discuss both direction and magnitude of any potential bias                 | 13    |
| Interpretation           | 20 | Give a cautious overall interpretation of results considering objectives, limitations, multiplicity of analyses, results from similar studies, and other relevant evidence | 12&13 |
| Generalisability         | 21 | Discuss the generalisability (external validity) of the study results                                                                                                      | 13    |
| <b>Other information</b> |    |                                                                                                                                                                            |       |
| Funding                  | 22 | Give the source of funding and the role of the funders for the present study and, if applicable, for the original study on which the present article is based              | 14    |

# BMJ Open

## Early Initiation of Antenatal Care and Factors Associated with Early Antenatal Care Initiation at public Health Centers at Bahir dar Zuria Zone, 2021:Cross Sectional Study Design

|                                 |                                                                                                                                                                                                                                                                     |
|---------------------------------|---------------------------------------------------------------------------------------------------------------------------------------------------------------------------------------------------------------------------------------------------------------------|
| Journal:                        | <i>BMJ Open</i>                                                                                                                                                                                                                                                     |
| Manuscript ID                   | bmjopen-2022-065169.R1                                                                                                                                                                                                                                              |
| Article Type:                   | Original research                                                                                                                                                                                                                                                   |
| Date Submitted by the Author:   | 19-Oct-2022                                                                                                                                                                                                                                                         |
| Complete List of Authors:       | Ambaye, Eskahun; Debre Markos University College of Health Science, health informatics<br>Hailiye, Gizaw; Debre Markos University College of Health Science, Department of Health Informatics<br>Regasa, zegeye; Debre Markos University College of Health Science, |
| <b>Primary Subject Heading</b>: | Obstetrics and gynaecology                                                                                                                                                                                                                                          |
| Secondary Subject Heading:      | Obstetrics and gynaecology, Reproductive medicine, Public health                                                                                                                                                                                                    |
| Keywords:                       | Maternal medicine < OBSTETRICS, Prenatal diagnosis < OBSTETRICS, PUBLIC HEALTH                                                                                                                                                                                      |
|                                 |                                                                                                                                                                                                                                                                     |

SCHOLARONE™  
Manuscripts





I, the Submitting Author has the right to grant and does grant on behalf of all authors of the Work (as defined in the below author licence), an exclusive licence and/or a non-exclusive licence for contributions from authors who are: i) UK Crown employees; ii) where BMJ has agreed a CC-BY licence shall apply, and/or iii) in accordance with the terms applicable for US Federal Government officers or employees acting as part of their official duties; on a worldwide, perpetual, irrevocable, royalty-free basis to BMJ Publishing Group Ltd ("BMJ") its licensees and where the relevant Journal is co-owned by BMJ to the co-owners of the Journal, to publish the Work in this journal and any other BMJ products and to exploit all rights, as set out in our [licence](#).

The Submitting Author accepts and understands that any supply made under these terms is made by BMJ to the Submitting Author unless you are acting as an employee on behalf of your employer or a postgraduate student of an affiliated institution which is paying any applicable article publishing charge ("APC") for Open Access articles. Where the Submitting Author wishes to make the Work available on an Open Access basis (and intends to pay the relevant APC), the terms of reuse of such Open Access shall be governed by a Creative Commons licence – details of these licences and which [Creative Commons](#) licence will apply to this Work are set out in our licence referred to above.

Other than as permitted in any relevant BMJ Author's Self Archiving Policies, I confirm this Work has not been accepted for publication elsewhere, is not being considered for publication elsewhere and does not duplicate material already published. I confirm all authors consent to publication of this Work and authorise the granting of this licence.

1  
2  
3 Early Initiation of Antenatal Care and Factors Associated with Early  
4 Antenatal Care Initiation at public Health Centers at Bahir dar Zuria  
5 Zone, 2021: Cross Sectional Study Design  
6  
7  
8  
9

10  
11 **Eskahun Ambaye<sup>1</sup>, Gizaw Hailiye<sup>1</sup> and Zegeye Regasa<sup>1</sup>**  
12  
13

14  
15  
16  
17  
18  
19 **AUTHORS NAME**

**EMAIL ADDRESS**

- 20  
21  
22 1. Eskahun Ambaye.....eskahunambaya@gmail.com  
23 2. Gizaw Hailiye.....ghailiye463@gmail.com  
24  
25  
26  
27

28 **CORRESPONDING AUTHOR**

- 29  
30  
31 3. Zegeye Regasa.....zegeyerega@gmail.com  
32  
33  
34  
35

36 **Author's details/affiliations**

37 1. College of Medicine and Health Sciences Institute of Public Health, Department of Health  
38 Informatics, Debre Markos university, Debre Markos, Ethiopia  
39  
40  
41  
42  
43  
44  
45  
46  
47  
48  
49  
50  
51  
52  
53  
54  
55  
56  
57  
58  
59  
60

## Abstract

**Objectives:** This study aimed to assess the proportion and factors associated with early initiation of antenatal care follow up among pregnant women attending antenatal care service at Bahir Dar Zuria zone public health centers, Bahir Dar, Ethiopia.

**Design:** An institutional based cross sectional study was conducted from Dec, 15/2020 to March 1, 2021. Systematic random sampling techniques were applied to select the participant.

**Setting:** This study conducted in five Public health centers (Han HC, Shimbit HC, Dagmawi Minilik HC, Shumabo HC and Meshentie HC) found in Bahir Dar Zuria Special Zone.

**Participant:** Pregnant mothers who were attending their antenatal care service during the data collection period were enrolled in this study. A total of 592 mothers were interviewed for the study.

**Outcome measure:** Early Initiation of Antenatal Care services

**Result:** It was found that 48.6% with [95% CI 41.6, 53.5] of the participants began their first antenatal care services before 16 weeks of gestation. Family size less than five (Adjusted odds ratio (AOR)= 2.0, 95% CI; 1.25-3.25), urban residence (AOR=3.0, 95% CI; 1.48, 6.17), secondary education (AOR=2.1, 95% CI; 1.3-3.6), college level and above (AOR=3.5, 95% CI; 1.8-6.8), primi gravida (AOR=2.6, 95% CI; 1.65-4.14), planned pregnancy (AOR=3.5, 95% CI; 1.5-8.1) and knowledge on early initiation of 1<sup>st</sup> ANC (AOR= 1.7, 95% CI; 1.14-2.55), were significantly associated with early initiation of first antenatal care.

**Conclusion and recommendation:** The study found that a significant number of the participants had not received ANC services in a timely manner. Socio-demographic and obstetric characteristics of the respondents were the major factors to determine timely booking of ANC services. Additionally dissemination of information about recommended time to initiate ANC services and cooperative effort to improve women's educational status to increase knowledge on early initiation of first antenatal care has to be conducted by Health extension workers, Bahir dar city administration, Regional and federal health bureaus respectively.

**Keywords:** Antenatal care, early initiation, pregnancy

### Strength and limitation of the study

- To ensure the quality of this research, training was given to data collectors and supervisors. Pretest was carried out prior to actual data collection to assess the validity of the questionnaire.
- The study presented the self-reported data by the women attending their antenatal care service at the study area. Therefore there is a possibility of social desirability and recall bias.
- The finding of this study was not triangulated on qualitative finding

peer review only

## Introduction

The physiological symptoms of pregnancy and the symptoms of pregnancy-related complications are sometimes difficult to differentiate. Pregnancy-related complications are risky health conditions that occur during pregnancy, it can involve the mother's and the child's health. (1,2).

To avert the problems, various maternal health care services are being provided. Among those services, Antenatal care (ANC) service is one of essential and key strategies for reducing maternal and neonatal morbidity and mortality directly through detection and treatment of pregnancy-related illnesses (2)(3)(4).

According to World Health Organization (WHO) recommendation pregnant women in developing countries have to get at least eight ANC visits, and initiate early ANC follow up (2). As per the 2016 WHO recommendation, Ethiopia is replaced the previous four-visit Focused ANC model with the new ANC eight-contact model (5). Huge progress has been made globally, however still maternal health is a global agenda. WHO 2019 report shows about 295 000 maternal deaths occurred in the globe due to pregnancy and childbirth related complications. (1,6) Sub-Saharan Africa and Southern Asia accounted for approximately 86% of the estimated global maternal deaths in 2017 (6).

Early antenatal care attendance during the first three months of gestation plays a major role in detecting and treating complications that occur during pregnancy (7). In Ethiopia 412 maternal deaths per 100,000 live birth occur in 2016 due to pregnancy or childbirth related complications and targeted reduction to 199/100,000 live births by 2020, Ethiopian Demographic Health Survey (EDHS) (4).

Despite ANC is provided free of charge and there is increased accessibility, but early initiation of ANC is still a major problem (8). In Ethiopia only 28% of women had their first ANC during the first trimester, while 43% of women in urban areas receive ANC within their first trimester of pregnancy, compared with 22% of those in rural areas, EDHS (9). Maternal education, previous history of early booking, age, and perception on frequency of ANC visit per pregnancy were significantly associated with the early ANC visit, awareness creation and strengthening on the importance of the early ANC visit need to be emphasized at the time of service provision (10,11).

1  
2  
3 Numbers of activities were done by the government to improve the early initiation of antenatal  
4 care in Ethiopia. Among those activities enhanced coordination of health extension workers,  
5 health development army , extended supportive supervision systems at national, regional, zonal,  
6 woreda, primary health care unit and community levels on maternal health services including  
7 early ANC initiation were the major activities.(12).  
8  
9

10  
11  
12 However, the factors associated with early initiation of ANC are not the same across different  
13 cultures, socio economic status and distance/access to health institution within a society. Thus  
14 assessing the factors associated for early initiation of ANC follow up in different set up is  
15 important to improve maternal health services. Therefore, this study aimed at determining the  
16 magnitude and identify factors associated with it among pregnant women attending antenatal  
17 clinic in public health centers in Bahir Dar Zuria Special Zone, Ethiopia.  
18  
19  
20  
21  
22

## 23 **Methods**

### 24 **Study area**

25  
26  
27  
28 Institutional based cross-sectional study was conducted in Bahir Dar Zuria special zone from  
29 December, 15, 2020 to march 1, 2021. A total population of Bahir Dar city estimated to be  
30 345,084 and 81,371 of them are women of reproductive age group. The city currently has 3  
31 governmental hospitals, 4 private hospitals,10 governmental health centers, 10 health posts, and  
32 more than 39 private clinics. There are more than 405 health care providers including health  
33 extension working at health centers of Bahir Dar city administration, among those 47 are  
34 midwives. According to the 2020 G.C annual zonal report, the antenatal coverage in the study  
35 area was 100% (3,4,13)  
36  
37  
38  
39  
40  
41

42 The study was conducted in five public health centers (Han HC, Shimbit HC, Dagmawi Minilik  
43 HC, Shumabo HC and Meshentie HC).  
44  
45

### 46 **Study variables**

#### 47 **Dependent variables**

48  
49  
50  
51 ANC initiation –early/late  
52

#### 53 **Independent variables**

1  
2  
3 Socio-demographic and economic factors: maternal age, educational status, occupation,  
4 marital status, ethnicity, religion, income, family size and residence, husband educational

5  
6 Pregnancy & maternal related factors: gravidity, history of abortion, health status of present  
7 pregnancy/danger sign, plan of pregnancy/unwanted pregnancy, past experience of antenatal  
8 care utilization, knowledge and awareness on timing of first antenatal care and Previous  
9 pregnancy complication  
10  
11

12  
13 **Behavioral factors:** information access, free of pain, access to media and distance of health  
14 facilities  
15

### 16 17 **Study population**

18 All pregnant women attending their antenatal care service in public health centers of Bahir  
19 Dar Zuria Special Zone during the data collection period.  
20  
21

### 22 **Inclusion criteria**

23 Pregnant women attending antenatal care service were included to the study  
24

### 25 **Exclusion criteria**

26 Women who have either unknown gestational age or not having ultrasound result or not  
27 known with physical examination and pregnant women who had danger signs of  
28 pregnancy/seriously ill were excluded from this study.  
29  
30

### 31 **Sampling Technique/ Procedure**

32 To select participants, systematic random sampling techniques were applied. The total  
33 sample size was proportionally allocated from the randomly selected five health centers  
34 based on their ANC loads. By considering;  $N$  (total pregnant woman who came for first ANC  
35 visit in previous two months in five health centers = 971),  $n$  (calculated sample size = 610)  
36 and  $k$ -interval  $K = N/n = 971/610 = 2$ , the first client was selected by lottery method among  
37 the first two ANC service users in each health centers.  $n$  = sample size allocated to each  
38 health centers,  $N$  = number of ANC clients in a health center in previous two month's  
39 performance (Han health center = 349, Shimbit health center = 200, Dagmawi Minilik health  
40 center = 251, Shumabo health center = 98 and Meshentie health center = 73). Then the final  
41 sample size proportionally allocated for each health centers.  
42  
43  
44  
45  
46  
47  
48  
49  
50

### 51 **Sample Size Determination**

52 The sample size was calculated using single population proportion formula. Taking 46.8%  
53 prevalence of early initiation of antenatal care from previous study(14). With an assumption  
54  
55  
56  
57  
58  
59  
60

of 95% confidence interval ( $z=1.96$ ), 5% margin of error ( $d=0.05$ ), 10% nonresponse rate and 1.5 design effect.

$$n = (Z\alpha/2)^2 P(1-P)/d^2 \quad n = (1.96)^2 0.468(1-0.468)/0.05^2 = 381$$

Where, n-sample size

$Z\alpha/2$ -Z value at 95% level of confidence [1.96]

P- is the proportion of early initiation of ANC

d- the margin of error at 95% confidence interval

By considering the 10% non-response rate  $381 \times 10/100 = 38$

Final sample size was  $381 \times 1.5 + 38 = 610$

### Operational definitions

*Antenatal care*- is Pregnancy related services given by skilled health care providers starting from conception up to the onset of labor (2,15,16)

*Early antenatal care*- is the first antenatal care received as soon as the pregnancy is suspected till 16 weeks of gestation (17–19).

### Data Collection Tool and Methods

Data related to socio-demographic, economic factors, pregnancy, maternal related factors and behavioral factors were collected by using a pretested and semi structured questionnaire (see appendix 1). The questionnaire was first developed in English and later translated into Amharic and finally re-translated back to English to check its consistency (20). Training was given to the supervisors and data collectors for two days by the principal investigator on the details of the questionnaire. The interview was conducted in Amharic. Face-to-face interviews were conducted with eligible mothers at an antenatal care clinic. Interviews were conducted by four midwives and supervised by two health professionals with degrees. Information related to gestational age was taken from mothers ultrasound result.

### Data Management and Analysis

The data were entered, coded and cleaned using EPI data version 4.6. After completion of entry the data were export to SPSS version 23 for analysis. Missing data were managed by observing cross tabulation results percentages. Bi-variable logistic regression was used to identify the association between independent variables and dependent variables, variables with p-value of less than 0.2 used for multi-variable logistic regression analysis to determine various factors on



1  
2  
3 the outcome variable and to control confounding effect. Adjusted odds ratio (AOR) with 95%  
4 confidence interval (CI) was used to identify the independent predictors of early initiation of  
5 antenatal care. P values less than 0.05 were taken as statistically significance. The goodness of fit  
6 of the model was assessed using HosmerLemeshow's statistical test and its values above 5%  
7 which is 0.76 indicate that the model has a good predictive ability. A multicollinearity test was  
8 performed for the variables included in the final multivariable model. Hence, the variables had a  
9 VIF value of less than five.

### 16 **Data Quality Assurance**

17  
18 To ensure the quality of this research training were given to data collectors and supervisors.  
19 Pretest were carried out in 5% of sample size prior to actual data collection out of the study  
20 area, to assess the validity of the questionnaire to check clarity of questions, ambiguity,  
21 arrangement of questions, order & options for the questions and skipping pattern accordingly.  
22 The whole data collection procedures were closely supervised by field supervisors and  
23 investigators to ensure the completeness and reliability of the gathered information  
24 throughout the data collection process.

### 31 **Patient and public involvement**

32 neither patients nor the public were involved in the design, planning, conduct or reporting of this  
33 study.

### 36 **Ethical Considerations**

37  
38 Ethical clearance was obtained from Yom post graduate college department of project  
39 planning and management, Research Ethical review board with reference ID. YC//207//2013.  
40 A legal official letter was submitted to the Bahir Dar city administration health department  
41 office to obtain their permission. Each participant gave written informed consent to participate  
42 in the study before data collection began.

### 48 **Result**

#### 51 **Socio-demographic characteristics of the respondent**

52  
53 A total of 592 pregnant women took part in the study. 48.6% (95% CI 41.6, 53.5) of the  
54 participants started their first antenatal care services before 16 weeks of gestation. Of the  
55  
56  
57

respondents 85.7% were followers of Orthodox Christian religion. The age of the respondents ranged from 17 to 45 years with a mean age of 26.31 (SD 4.72 years). More than three-fourth (476) of them were resides in urban areas.61.3% (366) of respondents were attended secondary and above in their educational level. (Table 1)

### Obstetric characteristics of the respondent

Regarding Obstetric characteristics of the study participants, 57.6% (341) of respondents were multi-gravida and two hundred seventy-eights (46.8%) had antenatal follow up in their previous pregnancies and five hundred forty-seven (92.1%) of pregnancies were planned. 13.7%(81) of the respondent had history of abortion. 51.5% (305) of respondent had knowledge on the timing of first ANC (Table 2, Table 3)

**Table 1: The socio- demographic characteristics of the pregnant women selected public health center in Bahir Dar special zone, 2021(n=592)**

| Variables                   | Characteristics         | Frequency | Percent |
|-----------------------------|-------------------------|-----------|---------|
| Age                         | >25                     | 293       | 49.5    |
|                             | ≥25                     | 299       | 50.5    |
| Residence                   | Urban                   | 476       | 80.3    |
|                             | Rural                   | 116       | 19.6    |
| Religion                    | Orthodox                | 508       | 85.7    |
|                             | Muslim                  | 67        | 11.3    |
|                             | Protestant              | 17        | 2.9     |
| Educational status of women | Primary                 | 229       | 38.7    |
|                             | Secondary & preparatory | 208       | 35.1    |
|                             | College and above       | 155       | 26.2    |
| Women occupation            | House wife              | 297       | 50.2    |
|                             | Farmer                  | 91        | 15.4    |
|                             | Employed Gov't/NGO      | 117       | 19.8    |
|                             | Merchant                | 87        | 14.7    |
| Monthly income              | <2000                   | 100       | 16.9    |

1  
2  
3  
4  
5  
6  
7  
8  
9  
10  
11  
12  
13  
14  
15  
16  
17  
18  
19  
20  
21  
22  
23  
24  
25  
26  
27  
28  
29  
30  
31  
32  
33  
34  
35  
36  
37  
38  
39  
40  
41  
42  
43  
44  
45  
46  
47  
48  
49  
50  
51  
52  
53  
54  
55  
56  
57  
58  
59  
60

|                                          |                         |     |      |
|------------------------------------------|-------------------------|-----|------|
|                                          | $\geq 2000$             | 492 | 83.1 |
| <b>Marital status</b>                    | Married                 | 581 | 98.1 |
|                                          | Unmarried/cohabitation  | 11  | 1.9  |
| <b>Husband educational status</b>        | Primary                 | 170 | 28.7 |
|                                          | Secondary & preparatory | 199 | 33.6 |
|                                          | College and above       | 211 | 35.6 |
| <b>Means of transportation</b>           | On foot                 | 207 | 35   |
|                                          | Taxi/Bajaj              | 385 | 65   |
| <b>Family size</b>                       | < 5                     | 395 | 66.7 |
|                                          | $\geq 5$                | 197 | 33.3 |
| <b>Distance to reach HC on foot came</b> | <30 minutes             | 181 | 30.6 |
|                                          | >30 minutes             | 17  | 2.9  |
| <b>Cost of transport</b>                 | <3 birr                 | 12  | 2    |
|                                          | 3-9 birr                | 220 | 37.2 |
|                                          | >9 birr                 | 147 | 24.8 |

*Table 2: Obstetric characteristics of pregnant women in selected public health centers of Bahir Dar special zone, 2021(n=592)*

| Variables                           | Description | Frequency | Percent |
|-------------------------------------|-------------|-----------|---------|
| <b>Gravida</b>                      | One         | 251       | 42.4    |
|                                     | Two & above | 341       | 57.6    |
| <b>History of abortion</b>          | Yes         | 81        | 13.7    |
|                                     | No          | 511       | 86.3    |
| <b>Minor disorders of pregnancy</b> | Yes         | 140       | 23.6    |
|                                     | No          | 452       | 76.4    |

**Table 3: Previous pregnancy and knowledge's of pregnant women related factors in public health centers of Bahir Dar special zone, 2021 (n = 592)**

| Variables                                         | Characteristics   | Frequency | Percent |
|---------------------------------------------------|-------------------|-----------|---------|
| <b>Had ANC follow up in your last px.</b>         | Yes               | 278       | 46.8    |
|                                                   | No                | 46        | 7.7     |
| <b>Place of delivery who had previous birth</b>   | Home              | 47        | 7.9     |
|                                                   | Health facilities | 265       | 44.8    |
| <b>Rout of delivery who had previous birth</b>    | SVD               | 243       | 41      |
|                                                   | C/S               | 69        | 11.7    |
| <b>Outcome of last birth</b>                      | Alive             | 298       | 50.3    |
|                                                   | Still birth       | 14        | 2.4     |
| <b>Knowledge on early initiation of first ANC</b> | <16wk             | 304       | 51.5    |
|                                                   | ≥16wk             | 288       | 48.5    |
| <b>Frequencies for ANC follow up</b>              | Once              | 10        | 1.7     |
|                                                   | 2-3               | 212       | 35.8    |
|                                                   | ≥4                | 353       | 59.6    |
| <b>ANC service reduce PMTCT</b>                   | Yes               | 518       | 87.5    |
|                                                   | No                | 74        | 12.5    |

### **Factors Associated with Early Initiations of First ANC Visit**

Bi-variable analysis showed that Age of women, residency, educational status of women, occupation of women, monthly income, means of transportation, gravidity, knowledge on early initiation of first ANC, family size, plan of pregnancy and minor disorders of current pregnancy were candidate variable for multivariable analysis. On multivariable analysis family size, gravidity, residence, educational status of women, plan of pregnancy and

knowledge on early initiation of first ANC, were true determinants of early initiation of first ANC visit at the p-value less than 0.05. The findings showed that those family size less than five were 2 times more likely to initiate early ANC than those family size is greater than five (AOR= 2.0, 95% CI; 1.25-3.25), those urban residence were 3 times more likely to initiate early than those residence were rural (AOR=3.0,95%CI;1.48,6.17), respondents with college level and above were 3.5 times more likely to initiate early ANC as compared to those with primary school (AOR=3.5, 95% CI; 1.8-6.8), those with secondary education are 2.1 times more likely to initiate than those with primary education(AOR=2.1,95%CI;1.3-3.6). respondents with primi gravida were 2.6 times more likely to initiate early than those respondents who had multigravida (AOR=2.6,95%CI;1.65-4.14), respondents with planned pregnancy were 3.5 times more likely to initiate early than those respondents with unplanned pregnancy(AOR=3.5,95%CI;1.5-8.1) and respondents who hadknowledge on early initiation of first ANC were more likely to start early as compared to their counterparts (AOR=1.7(1.14-2.55), were significantly associated with early initiation of antenatal care.(Table 4).

**Table 4: Factors association with early initiation of ANC, public health centers of Bahir Dar special zone, 2021(n=592)**

| Variables                 | Early initiation ANC |     | Odds ratio     |                   |
|---------------------------|----------------------|-----|----------------|-------------------|
|                           | Yes                  | No  | COR(95%CI)     | AOR(95%CI)        |
| <b>Age of women</b>       |                      |     |                |                   |
| <25                       | 113                  | 180 | 2.8(2.0-3.9)   | 1.0(0.54-1.8)     |
| ≥25                       | 191                  | 108 | 1              | 1                 |
| <b>Residence</b>          |                      |     |                |                   |
| Urban                     | 201                  | 275 | 10.8(5.9-19.8) | 3.0(1.48-6.17) ** |
| Rural                     | 103                  | 13  | 1              | 1                 |
| <b>Education of women</b> |                      |     |                |                   |
| Primary                   | 177                  | 52  | 1              | 1                 |
| Secondary                 | 85                   | 123 | 4.9(3.25-7.45) | 2.1(1.3-3.6) **   |
| College/above             | 42                   | 113 | 9.1(5.7-14.6)  | 3.5(1.8-6.8)**    |

**Occupation of women**

|            |     |     |                |                 |
|------------|-----|-----|----------------|-----------------|
| House wife | 152 | 132 | 0.67(0.44-1.0) | 1.1(0.71-2.01)  |
| Farmer     | 76  | 27  | 0.27(0.1-0.48) | 0.51(0.25-1.01) |
| Employed   | 23  | 61  | 2.0(1.1-3.76)  | 1.3(0.6-2.74)   |
| Merchant   | 53  | 68  | 1              | 1               |

**Monthly income**

|             |     |     |                |                 |
|-------------|-----|-----|----------------|-----------------|
| <2000 birr  | 76  | 24  | 1              | 1               |
| >=2000 birr | 228 | 264 | 3.6(2.24-5.99) | 1.09(0.57-2.07) |

**Means of transport**

|            |     |     |               |                |
|------------|-----|-----|---------------|----------------|
| On foot    | 129 | 78  | 1             | 1              |
| Taxi/Bajaj | 175 | 210 | 1.98(1.4-2.8) | 1.4(0.93-2.13) |

**Gravida**

|               |     |     |              |                   |
|---------------|-----|-----|--------------|-------------------|
| One           | 78  | 173 | 4.3(3.0-6.1) | 2.6(1.65-4.14) ** |
| Two and above | 226 | 115 | 1            | 1                 |

**knowledge on early initiation**

|     |     |     |               |                   |
|-----|-----|-----|---------------|-------------------|
| yes | 112 | 175 | 2.6(1.4-3.79) | 1.7(1.14-2.55) ** |
| no  | 192 | 113 | 1             | 1                 |

**Family size**

|     |     |     |              |                   |
|-----|-----|-----|--------------|-------------------|
| <5  | 163 | 232 | 3.5(2.4-5.1) | 2.0(1.25-3.25) ** |
| >=5 | 141 | 56  | 1            | 1                 |

**Plan of pregnancy**

|     |     |     |              |                 |
|-----|-----|-----|--------------|-----------------|
| Yes | 268 | 279 | 4.1(1.9-8.8) | 3.5(1.5-8.1) ** |
| No  | 36  | 9   | 1            | 1               |

**Minor disorders of px**

|     |     |     |                |               |
|-----|-----|-----|----------------|---------------|
| Yes | 16  | 23  | 1.56(0.8-3.02) | 1.3(0.57-3.0) |
| No  | 288 | 265 | 1              | 1             |

*N.B I=Reference category \* = significant at  $P < 0.05$ , \*\* = significant at  $P < 0.001$ .*

**Discussion**

This study aimed to assess the proportion of early booking of antenatal care at public health centers found in Bahir dar special zone. Additionally it targeted to identify factors associated with early initiation of ANC across Bahir dar Zone. Based on WHO recommendation pregnant women have to start first ANC booking within First trimesters. In Ethiopia due to high

1  
2  
3 governmental effort the proportion of women with the recommended four or more ANC visits  
4 increased from 12% in 2005 to 43% in 2019. During this same time period, the proportion of  
5 women who received ANC in the first trimester increased from 6% to 28%(9).  
6  
7

8  
9 In the study area, 48.6% of pregnant women received their First ANC visit within the  
10 recommended time frame. This finding is in line with prior studies conducted in southern  
11 Ethiopia 49.7%(13), Adigrat town, Tigray Ethiopia 48.2% (21) and Addis Zemen south Gondar,  
12 Ethiopia 47.5%(22). The proportion of early initiation of ANC was higher than the report of  
13 Mini Ethiopian demographic health survey conducted in 2019 which was only 28%. The  
14 variation between these finding could be due to this study was conducted in Bahir dar Zuria zone  
15 where Antenatal care coverage proportion are relatively high; hence, findings may not be similar  
16 in other parts of Ethiopia where there is a low proportion of Antenatal care coverage (9).Study  
17 from Addis Ababa showed higher Proportion of early ANC initiation than the current study, 58%  
18 of the women started their visit within first trimesters (23). This difference might be due to Addis  
19 Ababa is the capital of the country and the community there might have better health awareness  
20 than the current study (9).  
21  
22  
23  
24  
25  
26  
27  
28  
29

30  
31 Maternal education was the major significant factor in multivariable analysis, Mothers with  
32 college degree and above were 3.5 times and mother with secondary school and above were 2.1  
33 times more likely to initiate ANC service with the recommended time than mothers with only  
34 primary school. This finding was similar with study conducted at wollita sodo zone  
35 Ethiopia(18), and Myanmar(15). This might be due to mothers with high level education may  
36 have knowledge about what is necessary during pregnancy, the importance of ANC and  
37 importance of early initiate the service.  
38  
39  
40  
41  
42  
43

44 Pregnant women who had knowledge on early initiation of first ANC were 1.7 times more likely  
45 to initiate early as compared to their counterparts and this finding was consistent with the studies  
46 conducted in Addis Zemen hospital(22), central zone of Tigray (24) , study conducted in  
47 Benshanigul (25)and Ghana(26).This might be due to mothers with poor ANC knowledge may  
48 not have enough awareness about the importance of early initiate of ANC and also may not know  
49 time to initiate the services.  
50  
51  
52  
53  
54  
55  
56  
57  
58  
59  
60

1  
2  
3 Planned pregnancy also found to be a significant factor for early initiation of ANC, pregnant  
4 women with planned pregnancy were 3.5 times more likely to initiate early ANC than their  
5 counter part. This finding is consistent with studies from eastern zone Tigray(27) and Mandalay,  
6 Myanmar(15), this may be due to that timing of ANC affected by decision the women make  
7 during pregnancy, so it takes time starting from accepting the pregnancy itself to acknowledging  
8 the need for ANC.  
9

10  
11  
12  
13  
14 Place of residence also has a great impact on time to initiate ANC booking, the study showed  
15 that women reside in urban were 3 times more likely to initiate ANC follow up compare to  
16 women reside in rural this result is consistence with those studies undertaken in 2019 Mini  
17 EDHS(9) and Mandalay, Myanmar(15). The possible reason for this finding is that women reside  
18 in urban has the chance to access health facilities nearby than women reside in rural.  
19  
20  
21  
22

23  
24 The finding of this study was not triangulated with qualitative report, we were unable to include  
25 qualitative findings because the study was done during the COVID-19 epidemic, which had a  
26 substantial impact on our activities. Additionally the study presented the self-reported data,  
27 which was prone for social desirability and recall bias which we tried to eliminate as much as  
28 possible.  
29  
30  
31  
32

### 33 34 **Conclusions**

35  
36 The study found that a significant number of the participants had not received ANC services in a  
37 timely manner. Socio-demographic and obstetric characteristics of the respondents were the  
38 major factors to determine timely booking of ANC services. Family size, residence, educational  
39 status of women, gravidity, plan of pregnancy and knowledge on early initiation of first ANC  
40 were factors significantly associated with early initiation of antenatal care service.  
41  
42  
43  
44

### 45 46 **Recommendations**

47  
48 Additionally dissemination of information about recommended time to initiate ANC services and  
49 cooperative effort to improve women's educational status to increase knowledge on early  
50 initiation of first antenatal care has to be conducted by Health extension workers, Bahir dar city  
51 administration, Regional and federal health bureaus.  
52  
53  
54  
55  
56  
57  
58  
59  
60



## Abbreviations

ANC: antenatal care; HC: health centers; CSA: Central statistics agency; EDHS: Ethiopian demographic and health survey; IRB: Institutional Review Board; FMOH: Federal Ministry of Health; MM: maternal mortality; WHO: World Health Organization;

## Acknowledgements

The authors gratefully acknowledge Yom Post Graduate College in providing the opportunity to conduct this research for academic purpose.

## Availability of data and materials

The datasets during and/or analyzed during the current study is available from the corresponding author on reasonable request.

## Authors' contributions

Proposal preparation, acquisition of data, analysis and Interpretation of data was done by EA (principal investigator). Drafting the article, revising it critically for intellectual content, and final approval of the version to be published was done by EA, ZR and GH. All authors read and approved the final manuscript.

## Competing interests

The authors declare that they have no competing interests.

## Funding

The authors have not declared a specific grant for this research from any funding agency in the public, commercial or not-for-profit sectors.

## Ethical Considerations

Ethical clearance was obtained from Yom post graduate college department of project planning and management, Research Ethical review board with reference ID. YC//207//2013. A legal official letter was submitted to the Bahir Dar city administration health department office to obtain their permission. Each participant gave written informed consent to participate in the study before data collection began.

## References

1. Pregnancy Complications | Maternal and Infant Health | CDC [Internet]. [cited 2022 Feb 1]. Available from: <https://www.cdc.gov/reproductivehealth/maternalinfanthealth/pregnancy-complications.html>
2. Lincetto, O., Mothebesoane-Anoh, S., Gomez, P. and Munjanja, S. Opportunities for Africa's Newborns. *Antenatal Care*. (2012) [www.who.int/entity/pmnch/media/publications/aonsectionIII\\_2.pdf](http://www.who.int/entity/pmnch/media/publications/aonsectionIII_2.pdf)
3. Kahasse G, Alemayehu W. Factors associated with late ANC initiation among pregnant women in select public health centers of Addis Ababa , Ethiopia : unmatched case – control study design. *Pragmatic Obs Res*. 2017;223–30.
4. La A, Ma T. Initiation of Antenatal Care and Associated Factors among Pregnant Women in Public Health Centers in Addis Ababa , Ethiopia. :1–6.
5. Hanson J, Global A, Cdc R. National Antenatal care guidelines. *Minist Heal Ethiop* [Internet]. 2022;(February):1–113. Available from: [https://icapdatadissemination.wikischolars.columbia.edu/file/view/TRAC+report\\_Rwanda+National+ART+Evaluation\\_Final\\_18Jan08.doc/355073978/TRAC+report\\_Rwanda+National+ART+Evaluation\\_Final\\_18Jan08.doc](https://icapdatadissemination.wikischolars.columbia.edu/file/view/TRAC+report_Rwanda+National+ART+Evaluation_Final_18Jan08.doc/355073978/TRAC+report_Rwanda+National+ART+Evaluation_Final_18Jan08.doc)
6. Maternal mortality [Internet]. [cited 2020 Sep 24]. Available from: <https://www.who.int/news-room/fact-sheets/detail/maternal-mortality>
7. Tegegne TK, Chojenta C, Getachew T, Smith R, Loxton D. Antenatal care use in Ethiopia: A spatial and multilevel analysis. *BMC Pregnancy Childbirth*. 2019;19(1):V.
8. Gebremeskel F, Dibaba Y, Admassu B. Timing of First Antenatal Care Attendance and Associated Factors among Pregnant Women in Arba Minch Town and Arba Minch District, Gamo Gofa Zone, South Ethiopia. *J Environ Public Health*. 2015;2015.
9. Ethiopian Public Health Institute (EPHI), ICF. Ethiopia Mini Demographic and Health Survey 2019: Final Report [Internet]. 2021. 1–207 p. Available from: <https://dhsprogram.com/pubs/pdf/FR363/FR363.pdf>
10. SH H, ES M, MG D. Timely Initiation of First Antenatal Care Visit of Pregnant Women Attending Antenatal Care Service. *J Women's Heal Care*. 2016;05(06).
11. Wolde F, Mulaw Z, Zena T, Biadgo B, Limenih MA. Determinants of late initiation for antenatal care follow up: The case of northern Ethiopian pregnant women. *BMC Res Notes*. 2018;11(1):1–7.
12. Bekele A, Bekele T, Snetro-Plewman G, Tesfaye S, Worku A. Community-Based Care in Ethiopia Implementing a Demand Creation Strategy for Improved Maternal, Newborn, and Child Health Outcomes Authors. Available from: [www.mcsprogram.org](http://www.mcsprogram.org)
13. Abuka T, Alemu A. Assessment of Timing of First Antenatal Care Booking and Associated Factors among Pregnant Women who attend Antenatal Care at Health Facilities in Dilla town, Gedeo Zone, Southern Nations, Nationalities, and Peoples Region, Ethiopia, 2014. *J Pregnancy Child Heal*. 2016;3(3).

14. Alemu Y, Aragaw A. Early initiations of first antenatal care visit and associated factor among mothers who gave birth in the last six months preceding birth in Bahir Dar Zuria Woreda North West Ethiopia. *Reprod Health*. 2018;15(1):1–8.
15. Aung T, Oo W, Khaing W, Lwin N, Dar H. Late initiation of antenatal care and its determinants: a hospital based cross-sectional study. *Int J Community Med Public Heal*. 2016;3(4):900–5.
16. Tekelab T, Chojenta C, Smith R, Loxton D. Factors affecting utilization of antenatal care in Ethiopia: A systematic review and metaanalysis. *PLoS One*. 2019;14(4):1–24.
17. Gebresilassie B, Belete T, Tilahun W, Berhane B, Gebresilassie S. Timing of first antenatal care attendance and associated factors among pregnant women in public health institutions of Axum town, Tigray, Ethiopia, 2017: A mixed design study. *BMC Pregnancy Childbirth*. 2019;19(1):1–12.
18. Maycas Dembelu, Abigia Samuel, Kostir Andarge ST and MK. Assessment of Timely Initiation of First ANC Visit and Associated factors among pregnant mothers in wolita soddo public health facilities. 2013;(1):1–11.
19. Abebe T, Letta S, Gebrehana E, Feyera B. Timely Booking and Factors Associated with First Antenatal Care Attendance among Pregnant Women in Public Health Centers , Addis Ababa. 2017;1:21–8.
20. questioner. Appendix 1 Questioner (English) Annex I-English version information sheet and consent form.
21. Lerebo W. Magnitude and Associated Factors of Late Booking for Antenatal Care in Public Health Centers of Adigrat Town, Tigray, Ethiopia. *Clin Mother Child Heal*. 2015;12(1):1–8.
22. Wolde HF, Tsegaye AT, Sisay MM. Late initiation of antenatal care and associated factors among pregnant women in Addis Zemen primary hospital, South Gondar, Ethiopia. *Reprod Health*. 2019;16(1):1–8.
23. Gulema H, Berhane Y. Timing of First Antenatal Care Visit and its Associated Factors among Pregnant Women Attending Public Health Facilities in Addis Ababa, Ethiopia. *Ethiop J Health Sci*. 2017;27(2):139–46.
24. Grum T, Brhane E. Magnitude and factors associated with late antenatal care booking on first visit among pregnant women in public health centers in central zone of Tigray Region, Ethiopia: A cross sectional study. *PLoS One*. 2018;13(12):1–9.
25. Chimdessa BA, Estifanos N, Markos J. Magnitude of Late ANC Booking and its Determinant Factors among Pregnant Women Attended Public Health Centers and Private Clinic in Artumafursi District, Amhara Regional State, Special Zone of Oromia, Ethiopia. *Glob J Med Res*. 2019;19(1):1–8.
26. Ekholuenetale M, Nzopotam CI, Barrow A. Prevalence and socioeconomic inequalities in eight or more antenatal care contacts in Ghana: Findings from 2019 population-based data. *Int J Womens Health*. 2021;13:349–60.
27. Weldearegawi GG, Teklehaimanot BF, Gebru HT, Gebrezgi ZA, Tekola KB, Baraki MF. Determinants of late antenatal care follow up among pregnant women in Easter zone Tigray, Northern Ethiopia, 2018: unmatched case-control study. *BMC Res Notes [Internet]*. 2019;12(1):1–

1  
2  
3 9. Available from: <https://doi.org/10.1186/s13104-019-4789-8>  
4  
5  
6  
7  
8  
9  
10  
11  
12  
13  
14  
15  
16  
17  
18  
19  
20  
21  
22  
23  
24  
25  
26  
27  
28  
29  
30  
31  
32  
33  
34  
35  
36  
37  
38  
39  
40  
41  
42  
43  
44  
45  
46  
47  
48  
49  
50  
51  
52  
53  
54  
55  
56  
57  
58  
59  
60

For peer review only

## Appendix 1 Questioner (English)

### Annex I-English version information sheet and consent form

#### Yom Post Graduate

#### Department Project Planning and Management

Greeting

Good Morning / Good after noon

My name is ESKAHUN AMBAYE I am a student at Yom institute of economic development department of project planning and management. This study is aimed to assess the prevalence and determinant factors of early antenatal care follow up utilization among pregnant women attending antenatal care service at public health facilities of Bahir Dar Zuria zone, Amhara, Ethiopia, 2020. The results from this study will help different stake holders and health care providers design different feasible and accessible interventions to improve the prevalence of early antenatal care service utilization in the study area. And, since you met the criteria for the study participant selection, you are selected to be the participant for the study. The data contained in this interview will solely be used for this study, and your response will be kept confidential. For this purpose, on this interview, your name will not be written and there is no any means to check and link the study results to your responses. With the interview, if there any problem or unclear to you, you can communicate openly and for any question/s from the interview, you have the right to give no answer or stop the interview, but your participation is highly important for the success of the study. So, we politely request your cooperativeness to participate the interview.

Do you agree to participate in this study? Yes, \_\_\_\_\_ Continue.

No \_\_\_\_\_

Thank you once again for your participation in the study.

Investigator Name \_\_\_\_\_ Signature \_\_\_\_\_

Date of interview \_\_\_\_\_ Time started \_\_\_\_\_ Ending \_\_\_\_\_

Contact =+2510910210427

### 5.4.3 Annex II- English questionnaire

Questionnaire code number---

#### Part –I Socio demographic and economic variables

| S.N | Questions          | Response and codes                                                                                   | Remark/Skip |
|-----|--------------------|------------------------------------------------------------------------------------------------------|-------------|
| 101 | Age                | -----                                                                                                |             |
| 102 | Place of residence | 1. Urban<br>2. Rural                                                                                 |             |
| 103 | Religion           | 1. Orthodox<br>2. Muslim<br>3. Protestant<br>4. others                                               |             |
| 104 | Ethnicity          | 1. Amhara<br>2. Oromo<br>3. Tigray<br>4. others                                                      |             |
| 105 | Marital status     | 1. married<br>2. cohabitation<br>3. divorced<br>4. widowed                                           |             |
| 106 | Educational status | 1. illiterate<br>2. Read and write only<br>3. Primary (1-8)<br>4. 9-12<br>5. College level and above |             |
| 107 | Occupation         | 1. house wife<br>2. farmer<br>3. Employed/ Gov't & NGO/<br>4. merchant<br>5. other                   |             |

|                                              |                                                                                     |                                                                                                 |  |
|----------------------------------------------|-------------------------------------------------------------------------------------|-------------------------------------------------------------------------------------------------|--|
| 108                                          | Monthly income                                                                      | -----                                                                                           |  |
| 110                                          | Husband education                                                                   | 1.illiterate<br>2.Read and write only<br>3.Primary (1-8)<br>4.9-12<br>5.College level and above |  |
| 111                                          | Husband occupation                                                                  | 1. Employed/gov't &Ngo/<br>2. Farmer<br>3.Daily laborer<br>4.Merchant<br>5. Other               |  |
| 112                                          | Transportation access                                                               | 1.Yes<br>2.No                                                                                   |  |
| 113                                          | If, yes transportation cost that you pay for coming to and back from this hospital? | -----                                                                                           |  |
| <b>Part-II history of previous pregnancy</b> |                                                                                     |                                                                                                 |  |
| 114                                          | Have you had antenatal follow up in your last pregnancy?                            | 1.Yes<br>2.No                                                                                   |  |
| 115                                          | If yes-----How many visits did you get in your last pregnancy?                      | 1. Once<br>2. 2-3 visits<br>3. 4 and more                                                       |  |
| 116                                          | Time/duration/ of your pregnancy when you start antenatal follows up in your last   | 1.≤20weeks<br>2.21-34weeks                                                                      |  |

|                                   |                                                                             |                                                                                         |  |
|-----------------------------------|-----------------------------------------------------------------------------|-----------------------------------------------------------------------------------------|--|
|                                   | pregnancy? ( In week)                                                       | 3. $\geq 35$ weeks                                                                      |  |
| 117                               | Did you encounter any problem during your pregnancy?                        | 1. Yes<br>2. No                                                                         |  |
| 118                               | If yes what was the problem?                                                | 1. Hypertensive disorders<br>2. Antepartum hemorrhage<br>3. Anemia<br>4. Other-----     |  |
| 119                               | Where did you delivered your last baby?                                     | 1. Health center<br>2. Hospital<br>3. Home<br>4. other----                              |  |
| 120                               | What was the outcome of your last delivery?                                 | 1. Alive<br>2. dead                                                                     |  |
| 121                               | What was the route of delivery?                                             | 1. Spontaneously Vaginal<br>2. Assisted vaginal<br>3. Caesarean section<br>4. Other---- |  |
| <b>Part- III Knowledge Of ANC</b> |                                                                             |                                                                                         |  |
| 122                               | Is antenatal care follow up beneficial for the woman?                       | 1. Yes<br>2. No                                                                         |  |
| 123                               | Is antenatal follow up beneficial for the fetus?                            | 1. Yes<br>2. No                                                                         |  |
| 124                               | When is the ideal age of pregnancy to start antenatal follow-up?( In weeks) | 1. $\leq 16$ weeks<br>2. $> 16$ weeks                                                   |  |
| 125                               | How many times do you think a women needs to go for ANC?                    | 1. Once<br>2. 2-3x<br>3. $> 4$ x                                                        |  |
| <b>Part-IV Obstetric history</b>  |                                                                             |                                                                                         |  |
| 126                               | Gravidity                                                                   | 1. Premi gravida<br>2. Multi gravida                                                    |  |



|                                             |                                                       |                                                                                  |  |
|---------------------------------------------|-------------------------------------------------------|----------------------------------------------------------------------------------|--|
| 127                                         | History of abortion                                   | 1. Yes<br>2. No                                                                  |  |
| 128                                         | Parity                                                | 1. Nulli para<br>2. Primipara<br>3. Multi para                                   |  |
| 129                                         | Family size                                           | -----                                                                            |  |
| <b>Part- V History of current pregnancy</b> |                                                       |                                                                                  |  |
| 130                                         | Is the pregnancy planned                              | 1. Yes<br>2. No                                                                  |  |
| 131                                         | Waiting time to complete the service?                 | -----                                                                            |  |
| 132                                         | Time /duration/of pregnancy in weeks                  | 1. ≤16weeks<br>2. 16-20weeks<br>3. 21-34weeks<br>4. ≥35weeks                     |  |
| 133                                         | Is there Anyone who advise you to come ANC follow up? | 1. Yes<br>2. No                                                                  |  |
| 134                                         | If yes, from whom you get it?                         | 1. Health professional<br>2. Media<br>3. Neighbor<br>4. families<br>5. Other---- |  |
| 135                                         | Is there a problem in current pregnancy?              | 1. Yes<br>2. No                                                                  |  |

|  |                                  |  |  |
|--|----------------------------------|--|--|
|  | If yes what type of problem----- |  |  |
|--|----------------------------------|--|--|

For peer review only

1  
2  
3  
4  
5  
6  
7  
8  
9  
10  
11  
12  
13  
14  
15  
16  
17  
18  
19  
20  
21  
22  
23  
24  
25  
26  
27  
28  
29  
30  
31  
32  
33  
34  
35  
36  
37  
38  
39  
40  
41  
42  
43  
44  
45  
46  
47  
48  
49  
50  
51  
52  
53  
54  
55  
56  
57  
58  
59  
60

## STROBE—Checklist is used for this study

|                              | Item No | Recommendation                                                                                                                                                                                               | Page No |
|------------------------------|---------|--------------------------------------------------------------------------------------------------------------------------------------------------------------------------------------------------------------|---------|
| <b>Title and abstract</b>    | 1       | (a) Indicate the study's design with a commonly used term in the title or the abstract<br>(b) Provide in the abstract an informative and balanced summary of what was done and what was found                | II      |
| <b>Introduction</b>          |         |                                                                                                                                                                                                              |         |
| Background/rationale         | 2       | Explain the scientific background and rationale for the investigation being reported                                                                                                                         | 2       |
| Objectives                   | 3       | State specific objectives, including any prespecified hypotheses                                                                                                                                             |         |
| <b>Methods</b>               |         |                                                                                                                                                                                                              |         |
| Study design                 | 4       | Present key elements of study design early in the paper                                                                                                                                                      | 3       |
| Setting                      | 5       | Describe the setting, locations, and relevant dates, including periods of recruitment, exposure, follow-up, and data collection                                                                              | 3       |
| Participants                 | 6       | (a) Give the eligibility criteria, and the sources and methods of selection of participants                                                                                                                  | 3       |
| Variables                    | 7       | Clearly define all outcomes, exposures, predictors, potential confounders, and effect modifiers. Give diagnostic criteria, if applicable                                                                     | 3       |
| Data sources/<br>measurement | 8*      | For each variable of interest, give sources of data and details of methods of assessment (measurement). Describe comparability of assessment methods if there is more than one group                         | 4       |
| Bias                         | 9       | Describe any efforts to address potential sources of bias                                                                                                                                                    |         |
| Study size                   | 10      | Explain how the study size was arrived at                                                                                                                                                                    | 5       |
| Quantitative variables       | 11      | Explain how quantitative variables were handled in the analyses. If applicable, describe which groupings were chosen and why                                                                                 | 6       |
| Statistical methods          | 12      | (a) Describe all statistical methods, including those used to control for confounding                                                                                                                        | 6       |
|                              |         | (b) Describe any methods used to examine subgroups and interactions                                                                                                                                          | 6       |
|                              |         | (c) Explain how missing data were addressed                                                                                                                                                                  | 6       |
|                              |         | (d) If applicable, describe analytical methods taking account of sampling strategy                                                                                                                           | 6       |
|                              |         | (e) Describe any sensitivity analyses                                                                                                                                                                        | 6       |
| <b>Results</b>               |         |                                                                                                                                                                                                              |         |
| Participants                 | 13*     | (a) Report numbers of individuals at each stage of study—eg numbers potentially eligible, examined for eligibility, confirmed eligible, included in the study, completing follow-up, and analysed            | 7       |
|                              |         | (b) Give reasons for non-participation at each stage                                                                                                                                                         |         |
|                              |         | (c) Consider use of a flow diagram                                                                                                                                                                           |         |
| Descriptive data             | 14*     | (a) Give characteristics of study participants (eg demographic, clinical, social) and information on exposures and potential confounders                                                                     | 7&8     |
|                              |         | (b) Indicate number of participants with missing data for each variable of interest                                                                                                                          | 7       |
| Outcome data                 | 15*     | Report numbers of outcome events or summary measures                                                                                                                                                         | 7,8&9   |
| Main results                 | 16      | (a) Give unadjusted estimates and, if applicable, confounder-adjusted estimates and their precision (eg, 95% confidence interval). Make clear which confounders were adjusted for and why they were included | 10      |

|                          |    |                                                                                                                                                                            |       |
|--------------------------|----|----------------------------------------------------------------------------------------------------------------------------------------------------------------------------|-------|
|                          |    | (b) Report category boundaries when continuous variables were categorized                                                                                                  |       |
|                          |    | (c) If relevant, consider translating estimates of relative risk into absolute risk for a meaningful time period                                                           | 11    |
| Other analyses           | 17 | Report other analyses done—eg analyses of subgroups and interactions, and sensitivity analyses                                                                             | 11    |
| <b>Discussion</b>        |    |                                                                                                                                                                            |       |
| Key results              | 18 | Summarise key results with reference to study objectives                                                                                                                   | 12    |
| Limitations              | 19 | Discuss limitations of the study, taking into account sources of potential bias or imprecision. Discuss both direction and magnitude of any potential bias                 | 13    |
| Interpretation           | 20 | Give a cautious overall interpretation of results considering objectives, limitations, multiplicity of analyses, results from similar studies, and other relevant evidence | 12&13 |
| Generalisability         | 21 | Discuss the generalisability (external validity) of the study results                                                                                                      | 13    |
| <b>Other information</b> |    |                                                                                                                                                                            |       |
| Funding                  | 22 | Give the source of funding and the role of the funders for the present study and, if applicable, for the original study on which the present article is based              | 14    |

# BMJ Open

**Early initiation of antenatal care and its associated factors among pregnant women attending antenatal care at public health centers in Bahir Dar Zuria zone, Northwest Ethiopia, 2021: a cross-sectional study**

|                                 |                                                                                                                                                                                                                                              |
|---------------------------------|----------------------------------------------------------------------------------------------------------------------------------------------------------------------------------------------------------------------------------------------|
| Journal:                        | <i>BMJ Open</i>                                                                                                                                                                                                                              |
| Manuscript ID                   | bmjopen-2022-065169.R2                                                                                                                                                                                                                       |
| Article Type:                   | Original research                                                                                                                                                                                                                            |
| Date Submitted by the Author:   | 13-Dec-2022                                                                                                                                                                                                                                  |
| Complete List of Authors:       | Ambaye, Eskahun; Bahir Dar Health Science College, health informatics Hailiye, Gizaw; Debre Markos University College of Health Science, Department of Health Informatics Regasa, zegeye; Debre Markos University College of Health Science, |
| <b>Primary Subject Heading</b>: | Obstetrics and gynaecology                                                                                                                                                                                                                   |
| Secondary Subject Heading:      | Obstetrics and gynaecology, Reproductive medicine, Public health                                                                                                                                                                             |
| Keywords:                       | Maternal medicine < OBSTETRICS, Prenatal diagnosis < OBSTETRICS, PUBLIC HEALTH                                                                                                                                                               |
|                                 |                                                                                                                                                                                                                                              |

SCHOLARONE™  
Manuscripts



I, the Submitting Author has the right to grant and does grant on behalf of all authors of the Work (as defined in the below author licence), an exclusive licence and/or a non-exclusive licence for contributions from authors who are: i) UK Crown employees; ii) where BMJ has agreed a CC-BY licence shall apply, and/or iii) in accordance with the terms applicable for US Federal Government officers or employees acting as part of their official duties; on a worldwide, perpetual, irrevocable, royalty-free basis to BMJ Publishing Group Ltd ("BMJ") its licensees and where the relevant Journal is co-owned by BMJ to the co-owners of the Journal, to publish the Work in this journal and any other BMJ products and to exploit all rights, as set out in our [licence](#).

The Submitting Author accepts and understands that any supply made under these terms is made by BMJ to the Submitting Author unless you are acting as an employee on behalf of your employer or a postgraduate student of an affiliated institution which is paying any applicable article publishing charge ("APC") for Open Access articles. Where the Submitting Author wishes to make the Work available on an Open Access basis (and intends to pay the relevant APC), the terms of reuse of such Open Access shall be governed by a Creative Commons licence – details of these licences and which [Creative Commons](#) licence will apply to this Work are set out in our licence referred to above.

Other than as permitted in any relevant BMJ Author's Self Archiving Policies, I confirm this Work has not been accepted for publication elsewhere, is not being considered for publication elsewhere and does not duplicate material already published. I confirm all authors consent to publication of this Work and authorise the granting of this licence.

1  
2  
3 **Early initiation of antenatal care and its associated factors among**  
4 **pregnant women attending antenatal care at public health centers in**  
5  
6 **Bahir Dar Zuria zone, Northwest Ethiopia, 2021: a cross-sectional**  
7  
8 **study**  
9  
10  
11  
12

13 Eskahun Ambaye<sup>1</sup>, Zegeye Regasa<sup>2</sup>, Gizaw Hailiye<sup>2</sup>  
14  
15  
16  
17

- 18  
19 1. Bahir Dar Health Science College, Health informatics Department, Bahir Dar, Ethiopia  
20 2. College of Medicine and Health Sciences Institute of Public Health, Department of  
21 Health Informatics, Debre Markos university, Debre Markos, Ethiopia  
22  
23  
24  
25  
26  
27

28 **Correspondence to:**  
29

30 Zegeye Regasa  
31

32 zegeyerega@gmail.com  
33  
34  
35  
36

37 **Abstract**  
38

39 **Objectives:** This study aimed to assess the prevalence of, and factors associated with, early  
40 initiation of antenatal care (ANC) follow up among pregnant women attending ANC services at  
41 Bahir Dar Zuria zone public health centers, Bahir Dar, Northwest Ethiopia.  
42  
43

44 **Design:** An institution-based, cross-sectional study was conducted from December 15, 2020 to  
45 March 1, 2021. A systematic random sampling technique was applied to select the study  
46 participants.  
47  
48

49 **Setting:** Five public health centers (Han HC, Shimbit HC, Dagmawi Minilik HC, Shumabo HC  
50 and Meshentie HC) in Bahir Dar Zuria zone.  
51  
52  
53  
54  
55  
56  
57  
58  
59  
60

1  
2  
3 **Participants:** Pregnant mothers who were attending their antenatal care service during the data  
4 collection period were enrolled in this study. A total of 592 mothers were interviewed for the  
5 study.  
6  
7

8  
9 **Outcome measure:** Early initiation of ANC services (within 16 weeks of gestation).  
10

11  
12 **Results:** 48.6% (95% CI 41.6, 53.5) of participants began their first ANC service before 16  
13 weeks of gestation. Family size less than five (adjusted odds ratio [AOR] 2.0, 95% CI 1.25-  
14 3.25), urban residence (3.0, 1.48-6.17), secondary education (2.1, 1.3-3.6), college level  
15 education and above (3.5, 1.8-6.8), primi gravida (2.6, 1.65-4.14), planned pregnancy (3.5, 1.5-  
16 8.1), and knowledge about early initiation of first ANC (1.7, 1.14-2.55) were significantly  
17 associated with early initiation of ANC.  
18  
19  
20  
21  
22

23 **Conclusion:** A substantial number of the participants had not received ANC services in a timely  
24 manner. Socio-demographic and obstetric characteristics of the respondents were associated  
25 timely booking of ANC services. Dissemination of information about recommended time to  
26 initiate ANC services and efforts to improve women's educational status to increase knowledge  
27 on early initiation ANC are needed in the region.  
28  
29  
30  
31  
32  
33  
34

35 **Keywords:** Antenatal care, early initiation, pregnancy  
36  
37  
38  
39  
40  
41  
42  
43  
44  
45  
46  
47  
48  
49  
50  
51  
52  
53  
54  
55  
56  
57  
58  
59  
60



### Strengths and limitations of this study

- Pretest was carried out prior to actual data collection to assess the validity of the questionnaire used in the study.
- Training was given for data collectors and supervisors to ensure the quality of the data obtained.
- The study uses self-reported data from women attending their antenatal care service in the study area; therefore, there is a possibility of social desirability and recall bias.
- The findings of this study were not triangulated with relevant qualitative data.

### Introduction

The physiological symptoms of pregnancy and the symptoms of pregnancy-related complications are sometimes difficult to differentiate. Pregnancy-related complications are risky health conditions that occur during pregnancy. It can involve the mother's and the child's health (1,2).

To avert pregnancy-related complications, various maternal health care services are being provided. Among those services, antenatal care service is one of the essential and key strategies to reduce maternal and neonatal morbidity and mortality directly through the detection and treatment of pregnancy-related illnesses (2–4).

According to world health organization (WHO) recommendation pregnant women in developing countries have to get at least eight ANC visits and initiate early antenatal care follow up which helps to early detect and manage complications occur during pregnancy (2). As per the 2016 WHO recommendation, Ethiopia is replaced the previous four-visit focused ANC model with the new ANC eight-contact model(5).

Huge progress has been made globally, however still maternal health is a global agenda. WHO 2019 report shows about 295,000 maternal deaths occurred in the globe due to pregnancy and childbirth related complications (1,6). Sub-Saharan Africa and Southern Asia accounted for approximately 86% of the estimated global maternal deaths in 2017 (6).

1  
2  
3 Early ANC attendance during the first three months of gestation plays a major role in detecting  
4 and treating complications that occur during pregnancy (7). In Ethiopia 412 maternal deaths per  
5 100,000 live birth occur in 2016 due to pregnancy or childbirth-related complications and  
6 targeted reduction to 199/100,000 live births by 2020(4).  
7  
8  
9

10  
11 Despite ANC being provided free of charge and there is increased accessibility, early initiation  
12 of ANC is still major problem (8). In Ethiopia, only 28% of women had their first ANC during  
13 the first trimester, while 43% of women in urban areas receive ANC within their first trimester of  
14 pregnancy, compared with 22% of those in rural areas(9). Maternal education, previous history  
15 of early booking, maternal age, and perception of the frequency of ANC visits per pregnancy  
16 were significantly associated with the early ANC visit, awareness creation and strengthening on  
17 the importance of the early ANC visit need to be emphasized at the time of service  
18 provision(10,11).  
19  
20  
21  
22  
23  
24

25  
26 Numbers of activities were done by the government to improve the early initiation of antenatal  
27 care in Ethiopia. Among those activities enhanced coordination of health extension workers,  
28 health development army and extended supportive supervision systems at national, regional,  
29 zonal, woreda, primary health care unit, and community levels on maternal health services  
30 including early ANC initiation were the major activities (12).  
31  
32  
33  
34

35  
36 However, the factors associated with early initiation of ANC are not the same across different  
37 cultures, socioeconomic status, and distance/access to health institutions within society. Thus  
38 assessing the factors associated with early initiation of ANC follow-up in different setups is a  
39 key to improving maternal health services. Therefore, this study aimed to determine the  
40 magnitude and identify factors associated with it among pregnant women attending antenatal  
41 care in public health centers in Bahir Dar Zuria zone, Northwest Ethiopia.  
42  
43  
44

## 45 **Methods**

### 46 **Study design and setting**

47  
48  
49  
50 Institution-based cross-sectional study was conducted in Bahir Dar Zuria zone from December  
51 15, 2020 to march 1, 2021. The total population of Bahir Dar city is estimated to be 345,084, and  
52 81,371 of the total population is women of reproductive age group. The city currently has 3  
53 governmental hospitals, 4 private hospitals, 10 governmental health centers, 10 health posts, and  
54  
55  
56  
57

1  
2  
3 more than 39 private clinics. There are more than 405 health care providers including health  
4 extension working at health centers of Bahir Dar city administration, among those 47 are  
5 midwives. According to the 2020 G.C annual zonal report, the antenatal coverage in the study  
6 area was 100% (3,4,13).  
7  
8  
9

10 This study was conducted in five public health centers (Han HC, Shimbit HC, Dagmawi Minilik  
11 HC, Shumabo HC, and Meshentie HC).  
12  
13

## 14 **Study variables**

### 15 *Dependent variable*

16  
17 ANC initiation –early (<16weeks of gestation)/late  $\geq$  16 weeks of gestation).  
18  
19

### 20 *Independent variables*

21  
22 Socio-demographic and economic factors: maternal age, educational status, occupation,  
23 marital status, ethnicity, religion, income, family size, residence, and husband's education.  
24  
25

26  
27 Pregnancy & maternal-related factors: gravidity, history of abortion, the health status of  
28 present pregnancy/danger sign/, plan of pregnancy/unwanted pregnancy/, the experience of  
29 antenatal care utilization, knowledge and awareness on the timing of first antenatal care, and  
30 Previous pregnancy complication.  
31  
32

33  
34 Behavioral factors: information access, free of pain, access to media, and distance of health  
35 facilities.  
36  
37

### 38 **Study population**

39 All pregnant women attending their antenatal care service in public health centers of Bahir  
40 Dar Zuria zone during the data collection period.  
41  
42

### 43 **Inclusion criteria**

44 Pregnant women attending antenatal care service were included to the study.  
45  
46

### 47 **Exclusion criteria**

Women who have either unknown gestational age or do not have ultrasound results or are not known with physical examination and pregnant women who had danger signs of pregnancy/were seriously ill/ were excluded from this study.

### Sampling procedures

To select participants, a systematic random sampling technique was applied. The total sample size was proportionally allocated from the randomly selected five health centers based on their ANC loads. By considering; N (total pregnant women who came for their first ANC visit in the previous two months in five health centers = 971), n (calculated sample size = 610), and k-interval  $K = N/n = 971/610 = 2$ , the first client was selected by lottery method among the first two ANC service users in each health centers. n = sample size allocated to each health center, N = number of ANC clients in a health center in the previous two month's performance (Han health center = 349, Shimbit health center = 200, Dagmawi Minilik health center = 251, Shumabo health center =98 and Meshentie health center =73). Then the final sample size was proportionally allocated for each health center.

### Sample size determination

The sample size was calculated using single population proportion formula. Taking 46.8% prevalence of early initiation of antenatal care from previous study(14). With an assumption of 95% confidence interval ( $z=1.96$ ), 5% margin of error ( $d=0.05$ ), 10% non-response rate and 1.5 design effect.

$$n = (Z\alpha/2)^2 P (1-P)/d^2 \quad n = (1.96)^2 0.468(1-0.468)/0.05^2=381$$

Where, n-sample size

$Z\alpha/2$ -Z value at 95% level of confidence [1.96]

P- Is the proportion of early initiation of antenatal care

d- The margin of error at 95% confidence interval

By considering the 10% non-response rate  $381 \times 10/100=38$

Final sample size was  $381 \times 1.5+38 =610$ .

### Operational definitions

*Antenatal care*: is pregnancy related services given by skilled health care providers starting from conception up to the onset of labor (2,15,16).

1  
2  
3 *Early antenatal care:* is the first antenatal care received as soon as the pregnancy is  
4 suspected till 16 weeks of gestation (17–19).  
5

### 6 **Data collection**

7  
8 Data related to socio-demographic, economic factors, pregnancy, maternal-related factors,  
9 and behavioral factors were collected by using a pretested and semi-structured questionnaire  
10 (see appendix 1). The questionnaire was first developed in English, translated into Amharic  
11 and finally re-translated back to English to check its consistency. Training was provided for  
12 the supervisors and data collectors for two days by the principal investigator on the details of  
13 the questionnaire. The interview was conducted in Amharic by four midwives with eligible  
14 mothers at antenatal clinic, and supervised by two health professionals with degrees.  
15 Information related to gestational age was taken from the mothers ultrasound result.  
16  
17

### 18 **Data management and analysis**

19  
20 The data were entered, coded, and cleaned using EPI data version 4.6. After completion of the  
21 entry, the data were exported to SPSS version 23 for analysis. Missing data were managed by  
22 observing cross-tabulation results percentages. Bi-variable logistic regression was used to  
23 identify the association between independent variables and dependent variables, and variables  
24 with a p-value of less than 0.2 were used for multi-variable logistic regression analysis to  
25 determine various factors on the outcome variable and to control the confounding effect.  
26 Adjusted odds ratio (AOR) with a 95% confidence interval (CI) was used to identify the  
27 independent predictors of early initiation of antenatal care. P values less than 0.05 were taken as  
28 statistically significance. The goodness of fit of the model was assessed using Hosmer  
29 Lemeshow's statistical test and its values above 5% which is 0.76 indicate that the model has a  
30 good predictive ability. A multicollinearity test was performed for the variables included in the  
31 final multivariable model. Hence, the variables had a VIF value of less than five.  
32  
33  
34  
35  
36  
37  
38  
39  
40  
41  
42  
43  
44

### 45 **Data quality assurance**

To ensure the quality of this research training was given to data collectors and supervisors. Pretests were carried out in 5% of the sample size before actual data collection out of the study area, to assess the validity of the questionnaire to check the clarity of questions, ambiguity, arrangement of questions, order & options for the questions, and skipping pattern accordingly. The whole data collection procedures were closely supervised by field supervisors and investigators to ensure the completeness and reliability of the gathered information throughout the data collection process.

### **Ethical considerations**

Ethical clearance was obtained from Yom post graduate college department of project planning and management, Research Ethical review board with a reference ID. YC//207//2013. A legal official letter was submitted to the Bahir Dar city administration health department office to obtain their permission. Each participant gave written informed consent to participate in the study before data collection began.

### **Patient and public involvement**

None.

## **Results**

### **Socio-demographic characteristics**

A total of 592 pregnant women took part in the study. 48.6% (95% CI 41.6, 53.5) of the participants started their first antenatal care services before 16 weeks of gestation. Of the respondents, 85.7% were followers of the Orthodox Christian religion. The age of the respondents ranged from 17 to 45 years with a mean age of 26.31 (SD 4.72 years). More than three-fourths (476) of them were resides in urban areas. 61.3% (366) of respondents attended secondary and above in their educational level (Table 1).

### **Obstetric characteristics**

Regarding obstetric characteristics of the study participants, 57.6% (341) of respondents were multi-gravida, two hundred seventy-eights (46.8%) had antenatal follow up in their previous pregnancies and five hundred forty-seven (92.1%) of pregnancies were planned. 13.7%(81) of the respondent had a history of abortion. 51.5% (305) of the respondent knew the timing of the first ANC (Table 2, Table 3).

**Table 1: Socio-demographic characteristics of pregnant women at selected public health centers in Bahir Dar special zone, 2021(n=592)**

| Variables                   | Characteristics         | Frequency | Percent |
|-----------------------------|-------------------------|-----------|---------|
| Age                         | >25                     | 293       | 49.5    |
|                             | ≥25                     | 299       | 50.5    |
| Residence                   | Urban                   | 476       | 80.3    |
|                             | Rural                   | 116       | 19.6    |
| Religion                    | Orthodox                | 508       | 85.7    |
|                             | Muslim                  | 67        | 11.3    |
|                             | Protestant              | 17        | 2.9     |
| Educational status of women | Primary                 | 229       | 38.7    |
|                             | Secondary & preparatory | 208       | 35.1    |
|                             | College and above       | 155       | 26.2    |
| Women occupation            | House wife              | 297       | 50.2    |
|                             | Farmer                  | 91        | 15.4    |
|                             | Employed Gov't/NGO      | 117       | 19.8    |
|                             | Merchant                | 87        | 14.7    |
| Monthly income              | <2000                   | 100       | 16.9    |
|                             | ≥2000                   | 492       | 83.1    |
| Marital status              | Married                 | 581       | 98.1    |
|                             | Unmarried/cohabitation  | 11        | 1.9     |
| Husband educational status  | No education            | 12        | 2       |
|                             | Primary                 | 170       | 28.7    |
|                             | Secondary & preparatory | 199       | 33.6    |
|                             | College and above       | 211       | 35.6    |
| Means of transportation     | On foot                 | 207       | 35      |
|                             | Taxi/Bajaj              | 385       | 65      |
| Family size                 | < 5                     | 395       | 66.7    |

|                                          |                   |     |      |
|------------------------------------------|-------------------|-----|------|
|                                          | $\geq 5$          | 197 | 33.3 |
| <b>Distance to reach HC on foot came</b> | $\leq 30$ minutes | 186 | 31.6 |
|                                          | $> 30$ minutes    | 21  | 3.4  |
| <b>Cost of transport</b>                 | $< 3$ birr        | 16  | 2.7  |
|                                          | 3-9 birr          | 220 | 37.2 |
|                                          | $> 9$ birr        | 149 | 25.1 |

**Table 2: Obstetric characteristics of pregnant women at selected public health centers of Bahir Dar special zone, 2021 (n=592)**

| Variables                           | Description | Frequency | Percent |
|-------------------------------------|-------------|-----------|---------|
| <b>Gravida</b>                      | One         | 251       | 42.4    |
|                                     | Two & above | 341       | 57.6    |
| <b>History of abortion</b>          | Yes         | 81        | 13.7    |
|                                     | No          | 511       | 86.3    |
| <b>Minor disorders of pregnancy</b> | Yes         | 140       | 23.6    |
|                                     | No          | 452       | 76.4    |

**Table 3: Previous pregnancy and knowledge of pregnant women and related factors in public health centers of Bahir Dar special zone, 2021 (n = 592)**

| Variables                                        | Characteristics   | Frequency | Percent |
|--------------------------------------------------|-------------------|-----------|---------|
| <b>Had ANC follow up in your last pregnancy.</b> | Yes               | 278       | 46.8    |
|                                                  | No                | 46        | 7.7     |
| <b>Place of delivery who had previous birth</b>  | Home              | 47        | 7.9     |
|                                                  | Health facilities | 265       | 44.8    |



|                                                   |             |     |      |
|---------------------------------------------------|-------------|-----|------|
| <b>Rout of delivery who had previous birth</b>    | SVD         | 243 | 41   |
|                                                   | C/S         | 69  | 11.7 |
| <b>Outcome of last birth</b>                      | Alive       | 298 | 50.3 |
|                                                   | Still birth | 14  | 2.4  |
| <b>Knowledge on early initiation of first ANC</b> | <16wk       | 304 | 51.5 |
|                                                   | ≥16wk       | 288 | 48.5 |
| <b>Frequencies for ANC follow up</b>              | Once        | 10  | 1.7  |
|                                                   | 2-3         | 212 | 35.8 |
|                                                   | ≥4          | 353 | 59.6 |
| <b>ANC service reduce PMTCT</b>                   | Yes         | 518 | 87.5 |
|                                                   | No          | 74  | 12.5 |

### Factors associated with early initiation of first ANC visit

Bi-variable analysis showed that the Age of women, residency, educational status of women, occupation of women, monthly income, means of transportation, gravidity, knowledge of early initiation of first ANC, family size, plan of pregnancy, and minor disorders of current pregnancy were candidate variables for multivariable analysis. On multivariable analysis family size, gravidity, residence, educational status of women, plan of pregnancy, and knowledge on early initiation of first ANC were true determinants of early initiation of first ANC visit at the p-value less than 0.05. The findings showed that those family size less than five were 2 times more likely to initiate early ANC than those family size is greater than five (AOR= 2.0, 95% CI; 1.25-3.25). Urban resident were 3 times more likely to initiate early than those residence were rural (AOR=3.0, 95%CI; 1.48-6.17). Respondents with college level and above were 3.5 times more likely to initiate early ANC as compared to those with primary school (AOR=3.5, 95% CI; 1.8-6.8), and those with secondary education are 2.1 times more likely to initiate than those with primary education(AOR=2.1,95%CI;1.3-3.6). Respondents with primi gravida were 2.6 times more likely to initiate early than those

respondents who had multigravida (AOR=2.6, 95%CI; 1.65-4.14). Respondents with planned pregnancy were 3.5 times more likely to initiate early than those respondents with an unplanned pregnancy (AOR=3.5, 95%CI;1.5-8.1) and respondents who knew early initiation of first ANC were more likely to start early as compared to their counterparts (AOR=1.7(1.14-2.55) (Table 4).

**Table 4: Factors association with early initiation of ANC, public health centers of Bahir Dar special zone, 2021(n=592)**

| Variables                  | Early initiation ANC |     | Odds ratio     |                   |
|----------------------------|----------------------|-----|----------------|-------------------|
|                            | Yes                  | No  | COR(95%CI)     | AOR(95%CI)        |
| <b>Age of women</b>        |                      |     |                |                   |
| <25                        | 113                  | 180 | 2.8(2.0-3.9)   | 1.0(0.54-1.8)     |
| ≥25                        | 191                  | 108 | 1              | 1                 |
| <b>Residence</b>           |                      |     |                |                   |
| Urban                      | 201                  | 275 | 10.8(5.9-19.8) | 3.0(1.48-6.17) ** |
| Rural                      | 103                  | 13  | 1              | 1                 |
| <b>Education of women</b>  |                      |     |                |                   |
| Primary                    | 177                  | 52  | 1              | 1                 |
| Secondary                  | 85                   | 123 | 4.9(3.25-7.45) | 2.1(1.3-3.6) **   |
| College/above              | 42                   | 113 | 9.1(5.7-14.6)  | 3.5(1.8-6.8)**    |
| <b>Occupation of women</b> |                      |     |                |                   |
| House wife                 | 152                  | 132 | 0.67(0.44-1.0) | 1.1(0.71-2.01)    |
| Farmer                     | 76                   | 27  | 0.27(0.1-0.48) | 0.51(0.25-1.01)   |
| Employed                   | 23                   | 61  | 2.0(1.1-3.76)  | 1.3(0.6-2.74)     |
| Merchant                   | 53                   | 68  | 1              | 1                 |
| <b>Monthly income</b>      |                      |     |                |                   |
| <2000 birr                 | 76                   | 24  | 1              | 1                 |
| ≥2000 birr                 | 228                  | 264 | 3.6(2.24-5.99) | 1.09(0.57-2.07)   |
| <b>Means of transport</b>  |                      |     |                |                   |
| On foot                    | 129                  | 78  | 1              | 1                 |
| Taxi/Bajaj                 | 175                  | 210 | 1.98(1.4-2.8)  | 1.4(0.93-2.13)    |
| <b>Gravida</b>             |                      |     |                |                   |

|                          |     |     |                |                   |
|--------------------------|-----|-----|----------------|-------------------|
| One                      | 78  | 173 | 4.3(3.0-6.1)   | 2.6(1.65-4.14) ** |
| Two and above            | 226 | 115 | 1              | 1                 |
| <b>knowledge on ANC</b>  |     |     |                |                   |
| yes                      | 112 | 175 | 2.6(1.4-3.79)  | 1.7(1.14-2.55) ** |
| no                       | 192 | 113 | 1              | 1                 |
| <b>Family size</b>       |     |     |                |                   |
| <5                       | 163 | 232 | 3.5(2.4-5.1)   | 2.0(1.25-3.25) ** |
| >=5                      | 141 | 56  | 1              | 1                 |
| <b>Plan of pregnancy</b> |     |     |                |                   |
| Yes                      | 268 | 279 | 4.1(1.9-8.8)   | 3.5(1.5-8.1) **   |
| No                       | 36  | 9   | 1              | 1                 |
| <b>Minor disorders</b>   |     |     |                |                   |
| Yes                      | 16  | 23  | 1.56(0.8-3.02) | 1.3(0.57-3.0)     |
| No                       | 288 | 265 | 1              | 1                 |

*N.B I=Reference category \*= significant at  $P<0.0.5$ , \*\*=significant at  $P<0.001$ .*

## Discussion

This study aimed to assess the proportion of early booking of antenatal care at public health centers found in Bahir Dar Zuria zone. Additionally, it targeted to identify factors associated with early initiation of ANC across the Bahir Dar Zuria zone. Based on WHO recommendation pregnant women have to start the first ANC booking within the first trimesters. In Ethiopia, due to high governmental effort, the proportion of women with the recommended four or more ANC visits increased from 12% in 2005 to 43% in 2019. During this same period, the proportion of women who received ANC in the first trimester increased from 6% to 28% (9).

In the study area, 48.6% of pregnant women received their First ANC visit within the recommended time frame. This finding is in line with prior studies conducted in southern Ethiopia 49.7%(13), Adigrat town Tigray Ethiopia 48.2% (20), and Addis Zemen south Gondar Ethiopia 47.5%(21). The proportion of early initiation of ANC was higher than the report of the Mini Ethiopian demographic health survey conducted in 2019 which was only 28%. The variation between these findings could be due to this study was conducted in Bahir Dar Zuria zone where the Antenatal care coverage proportion is relatively high; hence, findings may not be similar in other parts of Ethiopia where there is a low proportion of antenatal care coverage (9). A study from Addis Ababa showed a higher proportion of early ANC initiation than the current

1  
2  
3 study, 58% of the women started their visit within the first trimesters (22). This difference might  
4 be due to Addis Ababa is the capital of the country and the community there might have better  
5 health awareness than the current study (9).  
6  
7

8  
9 Maternal education was the major significant factor in multivariable analysis, Mothers with  
10 college degree and above were 3.5 times and mother with secondary school and above were 2.1  
11 times more likely to initiate ANC service with the recommended time than mothers with only  
12 primary school. This finding was similar with study conducted at wollita sodo zone Ethiopia(18),  
13 and Myanmar(15). This might be due to mothers with high level education may have knowledge  
14 about what is necessary during pregnancy, the importance of ANC and importance of early  
15 initiate the service.  
16  
17

18 Pregnant women who had knowledge on early initiation of first ANC were 1.7 times more likely  
19 to initiate early as compared to their counterparts and this finding was consistent with the studies  
20 conducted in Addis Zemen hospital(21), central zone of Tigray (23) , Benshanigul (24)and  
21 Ghana(25). This might be due to mothers with poor ANC knowledge may not have enough  
22 awareness about the importance of early initiate of ANC and also may not know time to initiate  
23 the services.  
24  
25

26 Planned pregnancy was also found to be a significant factor for early initiation of ANC. Pregnant  
27 women with planned pregnancy were 3.5 times more likely to initiate early ANC than their  
28 counterparts. This finding is consistent with studies from eastern zone Tigray(26) and Mandalay,  
29 Myanmar(15), this may be due to the timing of ANC being affected by the decision the women  
30 make during pregnancy, so it takes time starting from accepting the pregnancy itself to  
31 acknowledging the need for ANC.  
32  
33

34 Place of residence also has a great impact on time to initiate ANC booking, the study showed  
35 that women reside in urban were 3 times more likely to initiate ANC follow up compare to  
36 women reside in rural. This result is consistence with those studies undertaken in 2019 (9) and  
37 Mandalay, Myanmar(15). The possible reason for this finding is that women reside in urban has  
38 the chance to access health facilities nearby than women reside in rural.  
39  
40  
41  
42  
43

44 The findings of this study were not triangulated with qualitative findings, we were unable to  
45 include qualitative findings because the study was done during the COVID-19 epidemic, which  
46  
47  
48  
49  
50  
51  
52  
53

1  
2  
3 had a substantial impact on our activities. Additionally the study presented the self-reported data,  
4 which was prone for social desirability and recall bias which we tried to eliminate as much as  
5 possible.  
6  
7  
8  
9

## 10 **Conclusions**

11 The study found that a significant number of the participants had not received ANC services in a  
12 timely manner. Socio-demographic and obstetric characteristics of the respondents were the  
13 major factors to determine timely booking of ANC services. Family size, residence, educational  
14 status of women, gravidity, plan of pregnancy and knowledge on early initiation of first ANC  
15 were factors significantly associated with early initiation of antenatal care service. Additionally  
16 dissemination of information about recommended time to initiate ANC services and cooperative  
17 effort to improve women's educational status to increase knowledge on early initiation of first  
18 antenatal care has to be conducted by Health extension workers, Bahir Dar city administration,  
19 Regional and federal health bureaus.  
20  
21  
22  
23  
24  
25  
26  
27  
28  
29  
30  
31  
32  
33

## 34 **Abbreviations**

35  
36 ANC: antenatal care; HC: health centers; CSA: Central statistics agency;  
37 EDHS: Ethiopian demographic and health survey; IRB: Institutional Review  
38 Board; FMOH: Federal Ministry of Health; MM: maternal mortality; WHO: World Health  
39 Organization;  
40  
41  
42

## 43 **Acknowledgements**

44 The authors gratefully acknowledge Yom Post Graduate College in providing the opportunity to  
45 conduct this research for academic purpose.  
46  
47

## 48 **Data availability statement**

49 The datasets during and/or analyzed during the current study is available from the corresponding  
50 author on reasonable request.  
51  
52

## 53 **Contributors**

1  
2  
3 Proposal preparation, acquisition of data, analysis and Interpretation of data was done by EA  
4 (principal investigator). Drafting the article, revising it critically for intellectual content, and final  
5 approval of the version to be published was done by EA, ZR and GH. All authors read and  
6 approved the final manuscript.  
7  
8  
9

### 10 **Competing interests**

11 The authors declare that they have no competing interests.

### 13 **Funding**

14 The authors have not declared a specific grant for this research from any funding agency in the  
15 public, commercial or not-for-profit sectors.  
16  
17

### 18 **Ethics statement**

19 Ethical clearance was obtained from Yom post graduate college department of project  
20 planning and management, Research Ethical review board with reference ID. YC//207//2013.  
21 A legal official letter was submitted to the Bahir Dar city administration health department  
22 office to obtain their permission. Each participant gave written informed consent to  
23 participate in the study before data collection began.  
24  
25  
26  
27  
28  
29  
30  
31  
32  
33  
34  
35

### 36 **References**

- 37 1. Pregnancy Complications | Maternal and Infant Health | CDC [Internet]. [cited 2022 Feb 1].  
38 Available from: [https://www.cdc.gov/reproductivehealth/maternalinfanthealth/pregnancy-](https://www.cdc.gov/reproductivehealth/maternalinfanthealth/pregnancy-complications.html)  
39 [complications.html](https://www.cdc.gov/reproductivehealth/maternalinfanthealth/pregnancy-complications.html)  
40
- 41 2. Lincetto O, Mothebesoane-Anoh S, Gomez P, Munjanja S. Antenatal Care III.  
42
- 43 3. Kahasse G, Alemayehu W. Factors associated with late ANC initiation among pregnant women in  
44 select public health centers of Addis Ababa , Ethiopia : unmatched case – control study design.  
45 Pragmatic Obs Res. 2017;223–30.  
46
- 47 4. Adela LA, Tiruneh MA. Initiation of Antenatal Care and Associated Factors among Pregnant  
48 Women in Public Health Centers in Addis Ababa , Ethiopia. :1–6.  
49
- 50 5. Hanson J, Global A, Cdc R. National Antenatal care guidelines. Minist Heal Ethiop [Internet].  
51 2022;(February):1–113. Available from:  
52 [https://icapdatadissemination.wikischolars.columbia.edu/file/view/TRAC+report\\_Rwanda+Nation-](https://icapdatadissemination.wikischolars.columbia.edu/file/view/TRAC+report_Rwanda+National+ART+Evaluation_Final_18Jan08.doc/355073978/TRAC+report_Rwanda+National+ART+Evaluation_Final_18Jan08.doc)  
53 [al+ART+Evaluation\\_Final\\_18Jan08.doc/355073978/TRAC+report\\_Rwanda+National+ART+Eva-](https://icapdatadissemination.wikischolars.columbia.edu/file/view/TRAC+report_Rwanda+National+ART+Evaluation_Final_18Jan08.doc/355073978/TRAC+report_Rwanda+National+ART+Evaluation_Final_18Jan08.doc)  
54 [luation\\_Final\\_18Jan08.doc](https://icapdatadissemination.wikischolars.columbia.edu/file/view/TRAC+report_Rwanda+National+ART+Evaluation_Final_18Jan08.doc/355073978/TRAC+report_Rwanda+National+ART+Evaluation_Final_18Jan08.doc)  
55  
56  
57  
58  
59  
60

- 1
  - 2
  - 3
  - 4
  - 5
  - 6
  - 7
  - 8
  - 9
  - 10
  - 11
  - 12
  - 13
  - 14
  - 15
  - 16
  - 17
  - 18
  - 19
  - 20
  - 21
  - 22
  - 23
  - 24
  - 25
  - 26
  - 27
  - 28
  - 29
  - 30
  - 31
  - 32
  - 33
  - 34
  - 35
  - 36
  - 37
  - 38
  - 39
  - 40
  - 41
  - 42
  - 43
  - 44
  - 45
  - 46
  - 47
  - 48
  - 49
  - 50
  - 51
  - 52
  - 53
  - 54
  - 55
  - 56
  - 57
  - 58
  - 59
  - 60
6. Maternal mortality [Internet]. [cited 2020 Sep 24]. Available from: <https://www.who.int/news-room/fact-sheets/detail/maternal-mortality>
7. Tegegne TK, Chojenta C, Getachew T, Smith R, Loxton D. Antenatal care use in Ethiopia: A spatial and multilevel analysis. *BMC Pregnancy Childbirth*. 2019;19(1):V.
8. Gebremeskel F, Dibaba Y, Admassu B. Timing of First Antenatal Care Attendance and Associated Factors among Pregnant Women in Arba Minch Town and Arba Minch District, Gamo Gofa Zone, South Ethiopia. *J Environ Public Health*. 2015;2015.
9. Ethiopian Public Health Institute (EPHI), ICF. Ethiopia Mini Demographic and Health Survey 2019: Final Report [Internet]. 2021. 1–207 p. Available from: <https://dhsprogram.com/pubs/pdf/FR363/FR363.pdf>
10. Hussen SH, Melese ES, Dembelu MG. Timely Initiation of First Antenatal Care Visit of Pregnant Women Attending Antenatal Care Service. *J Women's Heal Care*. 2016;05(06).
11. Wolde F, Mulaw Z, Zena T, Biadgo B, Limenih MA. Determinants of late initiation for antenatal care follow up: The case of northern Ethiopian pregnant women. *BMC Res Notes*. 2018;11(1):1–7.
12. Bekele A, Bekele T, Snetro-Plewman G, Tesfaye S, Worku A. Community-Based Care in Ethiopia Implementing a Demand Creation Strategy for Improved Maternal, Newborn, and Child Health Outcomes Authors. Available from: [www.mcsprogram.org](http://www.mcsprogram.org)
13. Abuka T, Alemu A. Assessment of Timing of First Antenatal Care Booking and Associated Factors among Pregnant Women who attend Antenatal Care at Health Facilities in Dilla town, Gedeo Zone, Southern Nations, Nationalities, and Peoples Region, Ethiopia, 2014. *J Pregnancy Child Heal*. 2016;3(3).
14. Alemu Y, Aragaw A. Early initiations of first antenatal care visit and associated factor among mothers who gave birth in the last six months preceding birth in Bahir Dar Zuria Woreda North West Ethiopia. *Reprod Health*. 2018;15(1):1–8.
15. Aung T, Khaing W, Lwin N, Dar H. Late initiation of antenatal care and its determinants: a hospital based cross-sectional study. *Int J Community Med Public Heal*. 2016;3(4):900–5.
16. Tekelab T, Chojenta C, Smith R, Loxton D. Factors affecting utilization of antenatal care in Ethiopia: A systematic review and metaanalysis. *PLoS One*. 2019;14(4):1–24.
17. Gebresilassie B, Belete T, Tilahun W, Berhane B, Gebresilassie S. Timing of first antenatal care attendance and associated factors among pregnant women in public health institutions of Axum town, Tigray, Ethiopia, 2017: A mixed design study. *BMC Pregnancy Childbirth*. 2019;19(1):1–12.
18. Maycas Dembelu, Abigia Samuel, Kostir Andarge. Assessment of Timely Initiation of First ANC Visit and Associated factors among pregnant mothers in wolita soddo public health facilities. 2013;(1):1–11.
19. Abebe T, Letta S, Gebrehana E, Feyera B. Timely Booking and Factors Associated with First Antenatal Care Attendance among Pregnant Women in Public Health Centers , Addis Ababa. 2017;1:21–8.
20. Lerebo W. Magnitude and Associated Factors of Late Booking for Antenatal Care in Public Health

- 1  
2  
3 Centers of Adigrat Town, Tigray, Ethiopia. *Clin Mother Child Heal*. 2015;12(1):1–8.  
4
- 5 21. Wolde HF, Tsegaye AT, Sisay MM. Late initiation of antenatal care and associated factors among  
6 pregnant women in Addis Zemen primary hospital, South Gondar, Ethiopia. *Reprod Health*.  
7 2019;16(1):1–8.  
8
- 9 22. Gulema H, Berhane Y. Timing of First Antenatal Care Visit and its Associated Factors among  
10 Pregnant Women Attending Public Health Facilities in Addis Ababa, Ethiopia. *Ethiop J Health*  
11 *Sci*. 2017;27(2):139–46.  
12
- 13 23. Grum T, Brhane E. Magnitude and factors associated with late antenatal care booking on first visit  
14 among pregnant women in public health centers in central zone of Tigray Region, Ethiopia: A  
15 cross sectional study. *PLoS One*. 2018;13(12):1–9.  
16
- 17 24. Chimdessa BA, Estifanos N, Markos J. Magnitude of Late ANC Booking and its Determinant  
18 Factors among Pregnant Women Attended Public Health Centers and Private Clinic in  
19 Artumafursi District, Amhara Regional State, Special Zone of Oromia, Ethiopia. *Glob J Med Res*.  
20 2019;19(1):1–8.  
21
- 22 25. Ekholuenetale M, Nzopotam CI, Barrow A. Prevalence and socioeconomic inequalities in eight or  
23 more antenatal care contacts in Ghana: Findings from 2019 population-based data. *Int J Womens*  
24 *Health*. 2021;13:349–60.  
25
- 26 26. Weldearegawi GG, Teklehaimanot BF, Gebru HT, Gebrezgi ZA, Tekola KB, Baraki MF.  
27 Determinants of late antenatal care follow up among pregnant women in Easter zone Tigray,  
28 Northern Ethiopia, 2018: unmatched case-control study. *BMC Res Notes [Internet]*. 2019;12(1):1–  
29 9. Available from: <https://doi.org/10.1186/s13104-019-4789-8>  
30  
31  
32  
33  
34  
35  
36  
37  
38  
39  
40  
41  
42  
43  
44  
45  
46  
47  
48  
49  
50  
51  
52  
53  
54  
55  
56  
57  
58  
59  
60



## Appendix 1 Questioner (English)

### Annex I-English version information sheet and consent form

#### Yom Post Graduate

#### Department Project Planning and Management

Greeting

Good Morning / Good after noon

My name is ESKAHUN AMBAYE I am a student at Yom institute of economic development department of project planning and management. This study is aimed to assess the prevalence and determinant factors of early antenatal care follow up utilization among pregnant women attending antenatal care service at public health facilities of Bahir Dar Zuria zone, Amhara, Ethiopia, 2020. The results from this study will help different stake holders and health care providers design different feasible and accessible interventions to improve the prevalence of early antenatal care service utilization in the study area. And, since you met the criteria for the study participant selection, you are selected to be the participant for the study. The data contained in this interview will solely be used for this study, and your response will be kept confidential. For this purpose, on this interview, your name will not be written and there is no any means to check and link the study results to your responses. With the interview, if there any problem or unclear to you, you can communicate openly and for any question/s from the interview, you have the right to give no answer or stop the interview, but your participation is highly important for the success of the study. So, we politely request your cooperativeness to participate the interview.

Do you agree to participate in this study? Yes, \_\_\_\_\_ Continue.

No \_\_\_\_\_

Thank you once again for your participation in the study.

Investigator Name \_\_\_\_\_ Signature \_\_\_\_\_

Date of interview \_\_\_\_\_ Time started \_\_\_\_\_ Ending \_\_\_\_\_

Contact =+2510910210427

### 5.4.3 Annex II- English questionnaire

Questionnaire code number---

#### Part –I Socio demographic and economic variables

| S.N | Questions          | Response and codes                                                                                   | Remark/Skip |
|-----|--------------------|------------------------------------------------------------------------------------------------------|-------------|
| 101 | Age                | -----                                                                                                |             |
| 102 | Place of residence | 1. Urban<br>2. Rural                                                                                 |             |
| 103 | Religion           | 1. Orthodox<br>2. Muslim<br>3. Protestant<br>4. others                                               |             |
| 104 | Ethnicity          | 1. Amhara<br>2. Oromo<br>3. Tigray<br>4. others                                                      |             |
| 105 | Marital status     | 1. married<br>2. cohabitation<br>3. divorced<br>4. widowed                                           |             |
| 106 | Educational status | 1. illiterate<br>2. Read and write only<br>3. Primary (1-8)<br>4. 9-12<br>5. College level and above |             |
| 107 | Occupation         | 1. house wife<br>2. farmer<br>3. Employed/ Gov't & NGO/<br>4. merchant<br>5. other                   |             |

|                                              |                                                                                     |                                                                                                 |  |
|----------------------------------------------|-------------------------------------------------------------------------------------|-------------------------------------------------------------------------------------------------|--|
| 108                                          | Monthly income                                                                      | -----                                                                                           |  |
| 110                                          | Husband education                                                                   | 1.illiterate<br>2.Read and write only<br>3.Primary (1-8)<br>4.9-12<br>5.College level and above |  |
| 111                                          | Husband occupation                                                                  | 1. Employed/gov't &Ngo/<br>2. Farmer<br>3.Daily laborer<br>4.Merchant<br>5. Other               |  |
| 112                                          | Transportation access                                                               | 1.Yes<br>2.No                                                                                   |  |
| 113                                          | If, yes transportation cost that you pay for coming to and back from this hospital? | -----                                                                                           |  |
| <b>Part-II history of previous pregnancy</b> |                                                                                     |                                                                                                 |  |
| 114                                          | Have you had antenatal follow up in your last pregnancy?                            | 1.Yes<br>2.No                                                                                   |  |
| 115                                          | If yes-----How many visits did you get in your last pregnancy?                      | 1. Once<br>2. 2-3 visits<br>3. 4 and more                                                       |  |
| 116                                          | Time/duration/ of your pregnancy when you start antenatal follows up in your last   | 1.≤20weeks<br>2.21-34weeks                                                                      |  |

|                                   |                                                                             |                                                                                         |  |
|-----------------------------------|-----------------------------------------------------------------------------|-----------------------------------------------------------------------------------------|--|
|                                   | pregnancy? ( In week)                                                       | 3. $\geq 35$ weeks                                                                      |  |
| 117                               | Did you encounter any problem during your pregnancy?                        | 1. Yes<br>2. No                                                                         |  |
| 118                               | If yes what was the problem?                                                | 1. Hypertensive disorders<br>2. Antepartum hemorrhage<br>3. Anemia<br>4. Other-----     |  |
| 119                               | Where did you delivered your last baby?                                     | 1. Health center<br>2. Hospital<br>3. Home<br>4. other----                              |  |
| 120                               | What was the outcome of your last delivery?                                 | 1. Alive<br>2. dead                                                                     |  |
| 121                               | What was the route of delivery?                                             | 1. Spontaneously Vaginal<br>2. Assisted vaginal<br>3. Caesarean section<br>4. Other---- |  |
| <b>Part- III Knowledge Of ANC</b> |                                                                             |                                                                                         |  |
| 122                               | Is antenatal care follow up beneficial for the woman?                       | 1. Yes<br>2. No                                                                         |  |
| 123                               | Is antenatal follow up beneficial for the fetus?                            | 1. Yes<br>2. No                                                                         |  |
| 124                               | When is the ideal age of pregnancy to start antenatal follow-up?( In weeks) | 1. $\leq 16$ weeks<br>2. $> 16$ weeks                                                   |  |
| 125                               | How many times do you think a women needs to go for ANC?                    | 1. Once<br>2. 2-3x<br>3. $> 4$ x                                                        |  |
| <b>Part-IV Obstetric history</b>  |                                                                             |                                                                                         |  |
| 126                               | Gravidity                                                                   | 1. Premi gravida<br>2. Multi gravida                                                    |  |

|                                             |                                                       |                                                                                  |  |
|---------------------------------------------|-------------------------------------------------------|----------------------------------------------------------------------------------|--|
| 127                                         | History of abortion                                   | 1. Yes<br>2. No                                                                  |  |
| 128                                         | Parity                                                | 1. Nulli para<br>2. Primipara<br>3. Multi para                                   |  |
| 129                                         | Family size                                           | -----                                                                            |  |
| <b>Part- V History of current pregnancy</b> |                                                       |                                                                                  |  |
| 130                                         | Is the pregnancy planned                              | 1. Yes<br>2. No                                                                  |  |
| 131                                         | Waiting time to complete the service?                 | -----                                                                            |  |
| 132                                         | Time /duration/of pregnancy in weeks                  | 1. ≤16weeks<br>2. 16-20weeks<br>3. 21-34weeks<br>4. ≥35weeks                     |  |
| 133                                         | Is there Anyone who advise you to come ANC follow up? | 1. Yes<br>2. No                                                                  |  |
| 134                                         | If yes, from whom you get it?                         | 1. Health professional<br>2. Media<br>3. Neighbor<br>4. families<br>5. Other---- |  |
| 135                                         | Is there a problem in current pregnancy?              | 1. Yes<br>2. No                                                                  |  |

1  
2  
3  
4  
5  
6  
7  
8  
9  
10  
11  
12  
13  
14  
15  
16  
17  
18  
19  
20  
21  
22  
23  
24  
25  
26  
27  
28  
29  
30  
31  
32  
33  
34  
35  
36  
37  
38  
39  
40  
41  
42  
43  
44  
45  
46  
47  
48  
49  
50  
51  
52  
53  
54  
55  
56  
57  
58  
59  
60

|  |                                  |  |  |
|--|----------------------------------|--|--|
|  | If yes what type of problem----- |  |  |
|--|----------------------------------|--|--|

For peer review only

STROBE—Checklist is used for this study

|                           | Item No | Recommendation                                                                                                                                                                                               | Page No |
|---------------------------|---------|--------------------------------------------------------------------------------------------------------------------------------------------------------------------------------------------------------------|---------|
| <b>Title and abstract</b> | 1       | (a) Indicate the study's design with a commonly used term in the title or the abstract                                                                                                                       | II      |
|                           |         | (b) Provide in the abstract an informative and balanced summary of what was done and what was found                                                                                                          |         |
| <b>Introduction</b>       |         |                                                                                                                                                                                                              |         |
| Background/rationale      | 2       | Explain the scientific background and rationale for the investigation being reported                                                                                                                         | 2       |
| Objectives                | 3       | State specific objectives, including any prespecified hypotheses                                                                                                                                             |         |
| <b>Methods</b>            |         |                                                                                                                                                                                                              |         |
| Study design              | 4       | Present key elements of study design early in the paper                                                                                                                                                      | 3       |
| Setting                   | 5       | Describe the setting, locations, and relevant dates, including periods of recruitment, exposure, follow-up, and data collection                                                                              | 3       |
| Participants              | 6       | (a) Give the eligibility criteria, and the sources and methods of selection of participants                                                                                                                  | 3       |
| Variables                 | 7       | Clearly define all outcomes, exposures, predictors, potential confounders, and effect modifiers. Give diagnostic criteria, if applicable                                                                     | 3       |
| Data sources/measurement  | 8*      | For each variable of interest, give sources of data and details of methods of assessment (measurement). Describe comparability of assessment methods if there is more than one group                         | 4       |
| Bias                      | 9       | Describe any efforts to address potential sources of bias                                                                                                                                                    |         |
| Study size                | 10      | Explain how the study size was arrived at                                                                                                                                                                    | 5       |
| Quantitative variables    | 11      | Explain how quantitative variables were handled in the analyses. If applicable, describe which groupings were chosen and why                                                                                 | 6       |
| Statistical methods       | 12      | (a) Describe all statistical methods, including those used to control for confounding                                                                                                                        | 6       |
|                           |         | (b) Describe any methods used to examine subgroups and interactions                                                                                                                                          | 6       |
|                           |         | (c) Explain how missing data were addressed                                                                                                                                                                  | 6       |
|                           |         | (d) If applicable, describe analytical methods taking account of sampling strategy                                                                                                                           | 6       |
|                           |         | (e) Describe any sensitivity analyses                                                                                                                                                                        | 6       |
| <b>Results</b>            |         |                                                                                                                                                                                                              |         |
| Participants              | 13*     | (a) Report numbers of individuals at each stage of study—eg numbers potentially eligible, examined for eligibility, confirmed eligible, included in the study, completing follow-up, and analysed            | 7       |
|                           |         | (b) Give reasons for non-participation at each stage                                                                                                                                                         |         |
|                           |         | (c) Consider use of a flow diagram                                                                                                                                                                           |         |
| Descriptive data          | 14*     | (a) Give characteristics of study participants (eg demographic, clinical, social) and information on exposures and potential confounders                                                                     | 7&8     |
|                           |         | (b) Indicate number of participants with missing data for each variable of interest                                                                                                                          | 7       |
| Outcome data              | 15*     | Report numbers of outcome events or summary measures                                                                                                                                                         | 7,8&9   |
| Main results              | 16      | (a) Give unadjusted estimates and, if applicable, confounder-adjusted estimates and their precision (eg, 95% confidence interval). Make clear which confounders were adjusted for and why they were included | 10      |

|                          |    |                                                                                                                                                                            |       |
|--------------------------|----|----------------------------------------------------------------------------------------------------------------------------------------------------------------------------|-------|
|                          |    | (b) Report category boundaries when continuous variables were categorized                                                                                                  |       |
|                          |    | (c) If relevant, consider translating estimates of relative risk into absolute risk for a meaningful time period                                                           | 11    |
| Other analyses           | 17 | Report other analyses done—eg analyses of subgroups and interactions, and sensitivity analyses                                                                             | 11    |
| <b>Discussion</b>        |    |                                                                                                                                                                            |       |
| Key results              | 18 | Summarise key results with reference to study objectives                                                                                                                   | 12    |
| Limitations              | 19 | Discuss limitations of the study, taking into account sources of potential bias or imprecision. Discuss both direction and magnitude of any potential bias                 | 13    |
| Interpretation           | 20 | Give a cautious overall interpretation of results considering objectives, limitations, multiplicity of analyses, results from similar studies, and other relevant evidence | 12&13 |
| Generalisability         | 21 | Discuss the generalisability (external validity) of the study results                                                                                                      | 13    |
| <b>Other information</b> |    |                                                                                                                                                                            |       |
| Funding                  | 22 | Give the source of funding and the role of the funders for the present study and, if applicable, for the original study on which the present article is based              | 14    |
