# Supplementary material for: Early initiation of antenatal care and its associated factors among pregnant women attending antenatal care at public health centres in Bahir Dar Zuria zone, Northwest Ethiopia, 2021: a cross-sectional study
Source: PubMed Central journal article supplement — BMJ Open. 2023 Jan 12;13(1):e065169. doi: 10.1136/bmjopen-2022-065169 (PMC9843213; doi:10.1136/bmjopen-2022-065169), 2023-01-12
Supplement: bmjopen-2022-065169supp001.pdf [file bmjopen-2022-065169supp001.pdf]

## Appendix 1 Questioner (English)

### Annex I-English version information sheet and consent form

#### Yom Post Graduate

#### Department Project Planning and Management

Greeting

Good Morning / Good after noon

My name is ESKAHUN AMBAYE I am a student at Yom institute of economic development department of project planning and management. This study is aimed to assess the prevalence and determinant factors of early antenatal care follow up utilization among pregnant women attending antenatal care service at public health facilities of Bahir Dar Zuria zone, Amhara, Ethiopia, 2020. The results from this study will help different stake holders and health care providers design different feasible and accessible interventions to improve the prevalence of early antenatal care service utilization in the study area. And, since you met the criteria for the study participant selection, you are selected to be the participant for the study. The data contained in this interview will solely be used for this study, and your response will be kept confidential. For this purpose, on this interview, your name will not be written and there is no any means to check and link the study results to your responses. With the interview, if there any problem or unclear to you, you can communicate openly and for any question/s from the interview, you have the right to give no answer or stop the interview, but your participation is highly important for the success of the study. So, we politely request your cooperativeness to participate the interview.

Do you agree to participate in this study? Yes, \_\_\_\_\_ Continue.

No \_\_\_\_\_

Thank you once again for your participation in the study.

Investigator Name \_\_\_\_\_ Signature \_\_\_\_\_

Date of interview \_\_\_\_\_ Time started \_\_\_\_\_ Ending \_\_\_\_\_

Contact =+2510910210427

**5.4.3 Annex II- English questionnaire**

Questionnaire code number---

**Part –I Socio demographic and economic variables**

| S.N | Questions          | Response and codes                                                                              | Remark/Skip |
|-----|--------------------|-------------------------------------------------------------------------------------------------|-------------|
| 101 | Age                | -----                                                                                           |             |
| 102 | Place of residence | 1.Urban<br>2. Rural                                                                             |             |
| 103 | Religion           | 1. Orthodox<br>2. Muslim<br>3. Protestant<br>4. others                                          |             |
| 104 | Ethnicity          | 1. Amhara<br>2. Oromo<br>3. Tigray<br>4. others                                                 |             |
| 105 | Marital status     | 1.married<br>2.cohabitation<br>3. divorced<br>4.widowed                                         |             |
| 106 | Educational status | 1.illiterate<br>2.Read and write only<br>3.Primary (1-8)<br>4.9-12<br>5.College level and above |             |
| 107 | Occupation         | 1.house wife<br>2.farmer<br>3.Employed/Gov't &NGO/<br>4.merchant<br>5. other                    |             |

|                                              |                                                                                     |                                                                                                 |  |
|----------------------------------------------|-------------------------------------------------------------------------------------|-------------------------------------------------------------------------------------------------|--|
| 108                                          | Monthly income                                                                      | -----                                                                                           |  |
| 110                                          | Husband education                                                                   | 1.illiterate<br>2.Read and write only<br>3.Primary (1-8)<br>4.9-12<br>5.College level and above |  |
| 111                                          | Husband occupation                                                                  | 1. Employed/gov't &Ngo/<br>2. Farmer<br>3.Daily laborer<br>4.Merchant<br>5. Other               |  |
| 112                                          | Transportation access                                                               | 1.Yes<br>2.No                                                                                   |  |
| 113                                          | If, yes transportation cost that you pay for coming to and back from this hospital? | -----                                                                                           |  |
| <b>Part-II history of previous pregnancy</b> |                                                                                     |                                                                                                 |  |
| 114                                          | Have you had antenatal follow up in your last pregnancy?                            | 1.Yes<br>2.No                                                                                   |  |
| 115                                          | If yes-----How many visits did you get in your last pregnancy?                      | 1. Once<br>2. 2-3 visits<br>3. 4 and more                                                       |  |
| 116                                          | Time/duration/ of your pregnancy when you start antenatal follows up in your last   | 1.≤20weeks<br>2.21-34weeks                                                                      |  |

|                                   |                                                                             |                                                                                     |  |
|-----------------------------------|-----------------------------------------------------------------------------|-------------------------------------------------------------------------------------|--|
|                                   | pregnancy? ( In week)                                                       | 3.≥35weeks                                                                          |  |
| 117                               | Did you encounter any problem during your pregnancy?                        | 1.Yes<br>2.No                                                                       |  |
| 118                               | If yes what was the problem?                                                | 1.Hypertensive disorders<br>2.Antepartum hemorrhage<br>3.Anemia<br>4.Other-----     |  |
| 119                               | Where did you delivered your last baby?                                     | 1.Health center<br>2.Hospital<br>3.Home<br>4. other----                             |  |
| 120                               | What was the outcome of your last delivery?                                 | 1.Alive<br>2.dead                                                                   |  |
| 121                               | What was the route of delivery?                                             | 1.Spontaneously Vaginal<br>2.Assisted vaginal<br>3.Caesarean section<br>4.Other---- |  |
| <b>Part- III Knowledge Of ANC</b> |                                                                             |                                                                                     |  |
| 122                               | Is antenatal care follow up beneficial for the woman?                       | 1.Yes<br>2.No                                                                       |  |
| 123                               | Is antenatal follow up beneficial for the fetus?                            | 1.Yes<br>2.No                                                                       |  |
| 124                               | When is the ideal age of pregnancy to start antenatal follow-up?( In weeks) | 1. ≤16weeks<br>2. >16weeks                                                          |  |
| 125                               | How many times do you think a women needs to go for ANC?                    | 1.Once<br>2.2-3x<br>3.>4 x                                                          |  |
| <b>Part-IV Obstetric history</b>  |                                                                             |                                                                                     |  |
| 126                               | Gravidity                                                                   | 1.Premi gravida<br>2.Multi gravida                                                  |  |

|                                             |                                                       |                                                                                  |  |
|---------------------------------------------|-------------------------------------------------------|----------------------------------------------------------------------------------|--|
| 127                                         | History of abortion                                   | 1.Yes<br>2.No                                                                    |  |
| 128                                         | Parity                                                | 1.Nulli para<br>2. Primipara<br>3.Multi para                                     |  |
| 129                                         | Family size                                           | -----                                                                            |  |
| <b>Part- V History of current pregnancy</b> |                                                       |                                                                                  |  |
| 130                                         | Is the pregnancy planned                              | 1.Yes<br>2. No                                                                   |  |
| 131                                         | Waiting time to complete the service?                 | -----                                                                            |  |
| 132                                         | Time /duration/of pregnancy in weeks                  | 1. ≤16weeks<br>2. 16-20weeks<br>3.21-34weeks<br>4. ≥35weeks                      |  |
| 133                                         | Is there Anyone who advise you to come ANC follow up? | 1.Yes<br>2.No                                                                    |  |
| 134                                         | If yes, from whom you get it?                         | 1. Health professional<br>2. Media<br>3. Neighbor<br>4. families<br>5. Other---- |  |
| 135                                         | Is there a problem in current pregnancy?              | 1. Yes<br>2. No                                                                  |  |

|  |                                  |  |  |
|--|----------------------------------|--|--|
|  | If yes what type of problem----- |  |  |
|--|----------------------------------|--|--|
